# Supplementary material for: Identification of Pparγ-modulated miRNA hubs that target the fibrotic tumor microenvironment
Source: PubMed Central journal article supplement — Proc Natl Acad Sci U S A. 2019 Dec 23;117(1):454–63. doi: 10.1073/pnas.1909145117 (PMC6955372; doi:10.1073/pnas.1909145117), 2019-12-23
Supplement: pnas.1909145117.sapp.pdf [file pnas.1909145117.sapp.pdf]

1

## 2 **Supplementary Information for**

### 3 **Identification of Ppar $\gamma$ -modulated miRNA hubs that target the fibrotic tumor** 4 **microenvironment**

5 **Ivana Winkler, Catrin Bitter, Sebastian Winkler, Dieter Weichenhan, Abhishek Thavamani, Jan G. Hengstler, Erawan**  
6 **Borkham-Kamphorst, Oliver Kohlbacher, Christoph Plass, Robert Geffers, Ralf Weiskirchen, Alfred Nordheim**

7 **Alfred Nordheim**

8 **E-mail: [alfred.nordheim@uni-tuebingen.de](mailto:alfred.nordheim@uni-tuebingen.de)**

#### 9 **This PDF file includes:**

- 10 Figs. S1 to S13
- 11 Tables S1 to S4
- 12 Captions for Databases S1 to S5
- 13 References for SI reference citations

#### 14 **Other supplementary materials for this manuscript include the following:**

- 15 Databases S1 to S5

## 16 Methods

17 Vectors pSV Sport PPAR gamma 1 and pMSCV-Lin28A were acquired from Addgene under the Uniform Biological Materials  
18 Transfer Agreement (UBMTA).

19 **SRF-VP16<sup>iHep</sup> animal model.** *SRF-VP16<sup>iHep</sup>* mice carry and express a constitutively active form of SRF, SRF-VP16. The  
20 SRF-VP16 fusion protein is comprised of the first 412 residues of human SRF fused to the transcriptional activation domain  
21 of the *Herpes simplex* viral VP16 protein. The VP16 transcriptional activation domain enables SRF-directed target gene  
22 activation independently of upstream stimulation by Rho/actin and Ras/MAPK signaling pathways, thus rendering SRF-VP16  
23 constitutively active (1).

24 To allow the conditional expression of SRF-VP16 upon cellular Cre recombinase activity, a floxed STOP cassette was  
25 introduced upstream of the SRF-VP16 coding sequence. The SRF-VP16 construct was integrated into the genomic Rosa26  
26 locus generating *Gt(ROSA)26-Sor<sup>tm1(SRF-VP16)</sup>Antu* mice.

27 To obtain *SRF-VP16<sup>iHep</sup>* mice, stop-floxed *SRF-VP16* mice were bred with *Srf-flex1* mice (floxed *Srf* exon 1) and *Alfp-  
28 CreER<sup>T2</sup>* animals which express tamoxifen-inducible hepatocyte-specific Cre recombinase. Therefore, this animal model shows  
29 conditional, Cre-mediated expression of SRF-VP16, combined with non-functional endogenous SRF. Tamoxifen treatment  
30 through activation of Cre recombinase efficiently induces SRF-VP16 expression, which leads to hepatocyte hyperproliferation  
31 (2).

32 Although Cre activation is dependent on tamoxifen treatment, spontaneous, stochastic Cre activation was also observed,  
33 leading to mosaic SRF-VP16 expression in a small number of hepatocytes. Hyperproliferation of affected hepatocytes leads to  
34 development of premalignant nodules throughout the liver and their gradual progression to HCC (2).

35 The tissue samples of premalignant nodules and HCC used in this study were isolated from *SRF-VP16<sup>iHep</sup>* mice, which  
36 developed HCC as a result of stochastic hepatocyte-specific activation of SRF-VP16. Liver tissue from litter siblings that did  
37 not develop HCC due to lack of either SRF-VP16 or Cre expression was used as controls.

38 **The murine carbon tetrachloride model.** The murine CCl<sub>4</sub> model serves as an experimental *in vivo* liver fibrosis model. CCl<sub>4</sub>  
39 (Sigma-Aldrich) was administered intraperitoneally to C57BL/6 mice (n=5) twice per week for six weeks at a concentration of  
40 0.8 μl/(g body weight) diluted in mineral oil following standardised operation procedures (3). Animals that received mineral  
41 oil alone served as controls.

42 **Isolation of pHSC.** Isolation of primary murine hepatic stellate cells (pHSC) from C57BL/6 mice was essentially performed  
43 as described previously (4). Briefly, healthy mice weighing about 20-25 g were sacrificed and the liver was perfused with  
44 pronase-collagenase solutions through the portal vein. The cells of the digested livers were dispersed and filtered through a nylon  
45 mesh. pHSCs were further enriched and purified from the remaining cells by Nycodenz (Axis-Shield) density centrifugation.  
46 Cells were counted in a Neubauer chamber and the viability of cells determined by trypan blue exclusion method using a  
47 ready-to-use 0.4% trypan blue solution. Cells were finally seeded on uncoated plastic in Dulbecco's modified Eagle's Medium  
48 (DMEM) supplemented with 10% fetal calf serum (FCS), 100 IU/mL penicillin, 10 μg/mL streptomycin and 4 mM glutamine.

49 **Activation of pHSC.** pHSC activation occurs when cells are plated on standard tissue plastic plates (4). To ensure the full  
50 activation of pHSC, cells were maintained in DMEM culture medium supplemented with 10% FCS, 100 IU/mL penicillin, 10  
51 μg/mL streptomycin and 4 mM glutamine for seven days. During this period cells were passaged once (after four days of cell  
52 culture) using the standard procedure for cell culture maintenance.

53 **Cultivation of cell lines.** The continuous murine hepatic stellate cell line GRX is an anchorage-dependent line displaying  
54 morphological characteristics of myofibroblasts (aHSC) (5). The cell line was obtained from the Rio de Janeiro Cell Bank  
55 (PABCAM, Federal University, Rio de Janeiro, Brazil). The murine fibroblast cell line NIH/3T3 (6), which when maintained  
56 under Tgfβ-rich conditions shows characteristics of myofibroblasts (7), was obtained from the American Type culture collection  
57 (ATCC). Both cell lines were maintained under standard growth conditions at 37°C in a humidified atmosphere with 5%  
58 CO<sub>2</sub>. Routinely, cells were grown in DMEM culture medium supplemented with 10% FCS, 100 IU/mL penicillin, 10 μg/mL  
59 streptomycin and 4 mM glutamine.

60 **Cell transfection.** Cells were transfected using either electroporation or lipofection procedure.

61 To perform the electroporation, 10<sup>6</sup> cells were used per experiment. The electroporation pulse generator was set to an  
62 impulse of 320 V for 15 ms. To transfect the cells, 20 μg of vector DNA was used together with 100 μg of salmon sperm carrier  
63 DNA (Thermo Fisher Scientific). Following electroporation, cells were incubated for 24 h.

64 To transfect vector DNA, lipofection reagent TransIT-LT1 (Mirus Bio) reagent was used. To transfect miRNA mimics and  
65 miRNA inhibitors (Dharmacon) RNAiMAX (Thermo Fisher Scientific) and DharmaFECT1 (Dharmacon) reagents were used,  
66 respectively.

67 If miRNA mimics or inhibitors were to be transfected together with vector DNA (e.g. as in luciferase assays), the vector  
68 DNA was transfected first using the TransIT-LT1 Transfection protocol according to the manufacturer's instructions. At least  
69 4 h post DNA transfection, the medium was changed and the RNAiMAX or DharmaFECT1 protocol was performed using  
70 miRNA mimics or miRNA inhibitors.

71 To generate stable cell lines, vector DNA was transfected using electroporation procedure. 24 h post-transfection, the cell  
72 culture medium was exchanged with a fresh medium supplemented with selection antibiotic (NIH/3T3 cells - 600 µg/ml G418  
73 (Invivogen) and GRX cells - 700 µg/ml G418). Selection medium was changed every 2 to 3 days. Cells were expanded over 2 to  
74 3 weeks to ensure the survival of only stably transfected cells.

75 **Total RNA isolation.** The mirVana isolation kit (Thermo Fisher Scientific) was used to prepare total RNA used for sRNA-seq.  
76 The isolation procedure was performed as stated in the manufacturer's instructions for isolation of total RNA. The RNeasy kit  
77 (Qiagen) was used to prepare RNA for RNA-seq according to the kit instructions. Alternatively, RNA isolation was performed  
78 using Trizol (Thermo Fisher Scientific) according to the manufacturer's instructions.

79 **DNase treatment of RNA samples.** To remove genomic DNA contamination in RNA samples, samples were treated with  
80 the RNase-free DNase Treatment and Removal Reagents Kit (Thermo Fisher Scientific) according to the manufacturer's  
81 instructions.

82 **DNA isolation.** The DNA used in the methylation study, was isolated using DNeasy Blood & Tissue kit (Qiagen) according to  
83 the manufacturer's instructions.

84 **sRNA-seq.** To profile the whole miRNome, sRNA-seq was performed on tumor and nodular tissue alongside the corresponding  
85 controls. List of used samples and corresponding metadata are presented in Suppl. Table 1.

86 The library was generated from 1 µg of total RNA using TruSeq Small RNA Library Prep Kits v2 (Illumina) according to  
87 manufacturer's protocol. The libraries were sequenced on Illumina HiSeq2500 using TruSeq SBS Kit v3-HS (50 cycles, single  
88 ended run) with an average of  $10^7$  reads per RNA sample. FASTQ files were trimmed with Cutadapt (v1.11) removing Illumina  
89 RNA adapter sequences (TGGAATTCTCGGGTGCCAAGG) and nucleotides with PHRED scores below 20. For each FASTQ  
90 file a quality report was generated using FASTQC (v0.11.4) tool before and after trimming. Alignment of trimmed FASTQ  
91 sequences was done using STAR Aligner (v2.5.2b) (8) against the mouse genome GRCm38 using miRBase (v21) annotation.  
92 One mismatch was allowed for successful alignment in at least 15 matches per sequence. Counts per smallRNA (feature) were  
93 calculated using STAR's parameter *quantMode* set to *GeneCounts*. Differential expression of small RNAs was determined using  
94 DESeq2 (9) (v1.22.2).

95 The code for the bioinformatic analysis outlined here is available in the following url: [https://ivanawinkler.github.io/mirna\\_paper/](https://ivanawinkler.github.io/mirna_paper/).

96 **RNA-seq.** The samples used for RNA-seq analysis and corresponding metadata are listed in Suppl. Table 1.

97 The RNaseq library was generated using the TruSeq RNA sample preparation kit (Illumina) according to manufacturer's  
98 protocol.

99 The libraries were sequenced on Illumina HiSeq2000 producing 100 bp long, single ended reads. On average  $10^7$  reads were  
100 sequenced per RNA sample.

101 FASTQ files were trimmed with Cutadapt (v1.11) removing Illumina RNA adapter sequences (AGATCGGAAGAGCA-  
102 CAGTCTGAACTCCAGTCAC) and nucleotides with PHRED scores below 20. For each FASTQ file a quality report was  
103 generated by FASTQC (v0.11.4) tool before and after trimming. Alignment of trimmed FASTQ sequences was done using STAR  
104 Aligner (v2.5.2b) against the mouse genome GRCm38. Counts per gene (feature) were calculated using STAR's parameter  
105 *quantMode* set to *GeneCounts*. Differential gene expression was determined using DESeq2 (v1.22.2).

106 The code for the bioinformatic analysis outlined here is available in the following url: [https://ivanawinkler.github.io/mirna\\_paper/](https://ivanawinkler.github.io/mirna_paper/).

107 **Reverse transcription and quantitative PCR.** Total RNA was reverse transcribed using miScript II RT Kit (Qiagen) which  
108 allows the conversion of all RNA species into cDNA.

109 The miScript SYBR Green PCR Kit (Qiagen) was used to quantify the expression of mature miRNAs and FastStart  
110 Universal SYBR Green Master (Roche) for pre-miRNA, pri-miRNA or mRNA quantification. To normalize the amount of  
111 cDNA between samples, endogenous controls were run alongside targets of interest. U6 small nuclear RNA (Rnu6) and/or  
112 small nucleolar RNA, C/D box 33 (Snord33) were used to normalize mature miRNA and the genes *Glyceraldehyde-3-phosphate*  
113 *dehydrogenase (Gapdh)*, *β-glucuronidase (Gusb)* and/or *TATA-box binding protein (Tbp)* served as endogenous controls for  
114 mRNA, pre-miRNA and pri-miRNA. Additionally, no-template controls were prepared for each primer pair as a control of  
115 cross-contamination. Each combination of cDNA and primer pair was analysed in triplicates in 10 µl reactions. All primer  
116 sequences are listed in supplementary material.

117 qPCR run was executed in QuantStudio 7 Flex Real-Time PCR System (Thermo Fisher Scientific). To validate the specificity  
118 of PCR, the amplicon melting curve was determined for each reaction in every run.

119 Postrun data processing was conducted using LinRegPCR (10) (<http://LinRegPCR.nl>). Result of the LinRegPCR analysis are  
120 target gene's starting concentrations which can easily be compared between different samples. The relative expression of target  
121 genes/miRNAs was calculated by averaging  $N_0$  values of technical replicates. To be able to compare the  $N_0$  value of target  
122 genes/miRNAs across samples, the  $N_0$  value of the targets was normalised to the  $N_0$  value of the endogenous controls. The  $N_0$   
123 value of all samples are expressed relative to a randomly chosen control sample. Data processing and statistical analysis were  
124 performed using R (<https://www.R-project.org>, v3.5.1). Normalised  $N_0$  values were compared using an two-sided unpaired  
125 t-test. Differences were considered statistically significant if the p-value was  $\leq 0.05$ .

126 **Staining of paraffin-embedded HCC samples.** Formalin-fixed and paraffin-embedded tissue samples (tumors and the corre-  
127 sponding control tissue) were deparaffinized in Rotihistol (Carl Roth) and rehydrated in an ethanol gradient. The antigen  
128 retrieval step was performed using citrate buffer. For immunostaining, the MaxFlour 488 Immunofluorescence Detection Kit  
129 (Dianova) was used together with Early Growth Response (Egr1) (Cell Signaling, cat. 4153) and Alpha Smooth Muscle Actin  
130 (ACTA2) (Abcam, ab7817) antibodies. The Egr1 and ACTA2 antibodies were diluted 1:800 and 1:100, respectively. Nuclei  
131 were stained using DAPI (Thermo Fisher Scientific).

132 To visualise collagen depositions in the embedded tissue samples, Sirius Red staining was performed. Samples were de-waxed  
133 and hydrated. Nuclei were visualised by Weigert's haematoxylin. Subsequently, tissue slides were stained with Picro-Sirius  
134 Red (Sigma-Aldrich, Cat#365548) and washed in acidified water. Samples were dehydrated in absolute ethanol, cleared  
135 in xylene and mounted in a resinous medium. Images were acquired by an Olympus confocal laser scanning microscope  
136 and quantified using ImageJ. The macro used for quantification is deposited in the GitHub repository (see *Data and code*  
137 *availability*). Measured stained %Area of total area was compared between control, nodular and tumor samples using one-way  
138 ANOVA and a post-hoc Tukey test.

139 **Chromatin immunoprecipitation.** The used ChIP protocol is based on the procedure described by Daniel et al. (11) with some  
140 modifications.

141 To reversibly cross-link the adherent cell lines, formaldehyde (Thermo Fisher Scientific) was directly added on the cell plate  
142 in a final concentration of 1 %. Per preparation (sample) 30 million cells were used. Added formaldehyde was diluted in  
143 phosphate-buffered saline (PBS). Cells were incubated for 10 min and the cross-linking reaction was stopped by adding glycine  
144 (Applichem) to a final concentration of 0.125 M.

145 Cells were scraped off the plate in 1 ml of cell lysis/wash buffer (0.15 M NaCl, 0.005 M EDTA pH 7.5, 0.05 M Tris-HCl pH  
146 7.5, 0.5 % NP40, dH<sub>2</sub>O supplemented with protease inhibitor (Roche) prior to use) and pelleted at 12,000 x g for 1 min. The  
147 pellet was resuspended in additional 1 ml of the cell lysis/wash buffer and passed through an insulin syringe. Following the  
148 centrifugation step, nuclei pellets were resuspended in 700 µl of nuclear lysis buffer (50 mM Tris-HCl pH 7.5, 1 % SDS, 20 mM  
149 EDTA).

150 Chromatin, which was released in the previous step, was subsequently fragmented by sonication into fragments of 200-1000  
151 base pairs (bp). Sonication was performed for 15 pulses of 20 s with a 30 s resting interval at 4°C on high energy settings  
152 (Bioruptor, Diagenode). Efficiency of sonication was validated by loading a small aliquot of chromatin onto the agarose gel.  
153 Remaining chromatin was cleared by centrifugation at 12,000 x g at 4°C for 10 min.

154 10% of chromatin was used as input. Chromatin used in immunoprecipitation was diluted 10 times using ChIP Dilution  
155 Buffer (0.001 M EDTA, pH 8.0, 0.017 M Tris-HCl, pH 8.0, 0.01 % SDS, 1.1 % Triton-X 100, 0.17 M NaCl, dH<sub>2</sub>O supplemented  
156 with protease inhibitor tablets (Roche) prior to use).

157 Chromatin was split in two fractions. The first fraction was incubated with 2 µg antibody of interest (PPAR $\gamma$  (Perseus  
158 proteomics, PP-A3409A)) and the second with IgG antibody (Milipore) used to assess the unspecific antibody binding. Samples  
159 were incubated overnight at 4 °C.

160 The following day, Protein A-coupled Dynabeads (Thermo Fisher Scientific) were blocked using Blocking buffer (0.1% PVP,  
161 0.1% UltraPure BSA in PBST (0.1% TWEEN-20 in PBS)) for 30 min at room temperature.

162 The blocked bead suspension was added to the chromatin sample and chromatin-antibody-bead complexes were incubated  
163 for 6 h at 4 °C.

164 The samples were washed using cell lysis/wash buffer five times. Chromatin was eluted in 450 µl Elution buffer at 65°C. To  
165 reverse the cross-linking, 20 µl 5M NaCl and 20 µl 0.5 M EDTA were added to all samples and samples were incubated at 65  
166 °C overnight.

167 DNA was isolated using a standard phenol:chloroform:isoamyl alcohol procedure. Target protein-bound DNA in immuno-  
168 precipitated samples, together with input samples, was quantified in qPCR. The Percent Input Method was used as method  
169 of normalization. Calculated values of Percent Input were compared using an two-sided unpaired t-test. Differences were  
170 considered statistically significant if the p-value was  $\leq 0.05$ .

171 **Methylation analysis.** Quantitative DNA methylation analysis was performed by matrix-assisted time-of-flight mass spectrometry  
172 (MassARRAY; Agena Bioscience) essentially as described previously (12) using primers listed in supplementary material.  
173 In brief, genomic DNA was bisulfite-converted and used as template to generate PCR amplicons with a T7-promoter tag.  
174 *In vitro*-generated RNA from the amplicons was cleaved by RNase A providing specific fragments which were analysed by  
175 MassARRAY. Fragments with ambiguous or too low ( $\leq 1500$ ) or too high ( $\geq 7000$ ) masses were omitted from the analysis. Beta  
176 values were compared using Mann-Whitney U test. Differences were considered statistically significant if the p-value was  $\leq$   
177 0.05.

178 **Luciferase assay.** To experimentally validate the functionality of predicted miRNA targeting, a luciferase gene reporter assay  
179 was used. The predicted target site or the full length 3'-UTR and a mutated version were subcloned downstream of the  
180 luciferase gene and transfected together with a specific miRNA mimic or inhibitor. The list of miRNA:mRNA pairs for which  
181 targeting was experimentally validated and obtained corresponding experimental data are presented in Suppl. Table 2.

182 pmirGLO Dual-Luciferase miRNA Target Expression Vector was used as backbone vector to clone in a partial or full length  
183 3'-UTR region of *Col1a1*, *Pdgfa*, *Adamts15* and *Tgfb1* genes. Following vector transfection, cells were transfected with a  
184 miRNA mimic or inhibitor of interest. Final concentration of all miRNA mimics and inhibitors was 50 µM.

185 To mutate miRNA sites in all pmirGLO vectors, Q5 Site-Directed Mutagenesis kit (NEB) was used according to the  
186 manufacturer's instructions.

187 After 24 h, luciferase activity was measured using Dual-Luciferase Reporter Assay (Promega) according to the manufacturer's  
188 instructions. Luciferase activity was measured using OPTIMA FluoroSTAR. To compare measured luciferase fluorescence units  
189 (LFU), a two-sided unpaired t-test was used. Differences were considered statistically significant if the p-value was  $\leq 0.05$ .

190 Primers used for cloning and mutagenesis are listed in Additional data table S4.

191 **Modulation of target gene expression using miRNA mimics and inhibitors.** Monitoring of the target gene expression upon  
192 miRNA mimic or inhibitor transfection was used as alternative approach to experimentally validate the functionality of  
193 predicted miRNA targeting. miRNA mimics and inhibitors were transfected as described in section *Cell transfection*. Final  
194 concentrations of miR-29c and let-7g mimics were 100  $\mu\text{M}$ , while miR-338 and let-7c mimics as well as let-7g and miR-29c  
195 inhibitors were used in final concentration of 50  $\mu\text{M}$ . Gene expression was quantified as reported in section *Reverse transcription*  
196 *and quantitative PCR*.

197 **PGJ<sub>2</sub> treatment of stable Ppar $\gamma$ -overexpressing GRX cells.** To assess effects of Ppar $\gamma$ -mediated miRNA expression on fibrotic  
198 target genes, stable Ppar $\gamma$ -overexpressing GRX cells were treated with the Ppar $\gamma$ -agonist PGJ<sub>2</sub> (Sigma Aldrich) and simultane-  
199 ously transfected with miRNA inhibitors. Transfection of miR-29c and let-7g inhibitors was performed as described in section  
200 *Cell transfection* using starvation medium (0.5% FCS, 100 IU/mL penicillin, 10  $\mu\text{g}/\text{mL}$  streptomycin and 4 mM glutamine) with  
201 or without PGJ<sub>2</sub> (final concentration 2 $\mu\text{M}$ ) as transfection medium. Cells were washed with PBS before transfection medium  
202 was added. Cells were incubated for 16 h before gene expression was quantified as reported in section *Reverse transcription*  
203 *and quantitative PCR*.

204 **Vectors.** To generate the pMSCV vector, the pMSCV-Lin28A vector (Addgene) was digested using *EcoRI* (Thermo Fisher  
205 Scientific) and *BglII* (Thermo Fisher Scientific) restriction enzymes under standard conditions. Digested vector DNA was  
206 loaded onto 1 % agarose gel and the vector backbone was isolated from the gel using QIAquick Gel Extraction Kit (Qiagen)  
207 according to the manufacturer's instructions.

208 Two single-stranded, complementary oligonucleotides were annealed to form a double-stranded DNA fragment. 3  $\mu\text{g}$  of  
209 complementary oligonucleotides were mixed in 60  $\mu\text{l}$  annealing buffer (100 mM NaCl, 50 mM HEPES, pH 7.4). Oligonucleotides  
210 were initially heated to 90°C for 4 min to dissolve secondary structures and gradually cooled to 37°C (0.03°C/s) to facilitate  
211 hybridization.

212 Annealed nucleotides were inserted into the vector backbone following the standard ligation protocol.

213 pSV Sport PPAR gamma 1 vector was modified by inserting the *Neomycine resistance gene* into the vector backbone.

214 pMSCV-mLin28A was a gift of George Daley (Addgene plasmid #26357) (13) and pSV Sport PPAR gamma 1 was kindly  
215 provided by Bruce Spiegelman (Addgene plasmid #8886) (14).

216 pmirGLO vector was purchased from Promega.

217 Short description of all vectors used in this study is contained in supplementary material (Suppl. Table 3).

218 **miRNA target prediction.** To identify miRNA targets, the DIANA microT-CDS (v5) (15) and TargetScan (v7.2) (16) databases  
219 were used. miRNA:mRNA targeting pairs, identified using aforementioned algorithms, were further filtered in accordance  
220 with their expression in our sRNA-seq and RNA-seq mouse datasets. miRNAs typically downregulate their targets. Thus, in  
221 order to identify targets of downregulated miRNAs, target mRNA candidates generated through bioinformatic analysis were  
222 matched with the upregulated genes found by RNA-seq. Similarly, upregulated miRNAs were matched with downregulated  
223 target mRNA candidates found by RNA-seq. miRNAs were considered down/upregulated when their expression was 1.5 fold  
224 down/upregulated with  $p_{adj}$ -value  $\leq 0.05$  in tumor compared to control. mRNAs were considered down/upregulated when  
225 their expression was two fold down/upregulated and/or  $p_{adj}$ -value  $\leq 0.05$ . To profile evolutionary conserved targeting, a similar  
226 analysis was performed for the human HCC TCGA dataset. miRNAs and mRNAs in the TCGA dataset were considered to  
227 be dysregulated if at least one miRNA family member was dysregulated (threshold 1.5 fold) in  $\geq 10\%$  of cases of the cohort.  
228 miRNA:target mRNA pairs of both datasets were overlapped and only those pairs that showed conservation (i.e. targeting in  
229 both mice and humans) were used in the gene enrichment analysis.

230 Gene enrichment analysis using predicted miRNA gene targets was performed using KEGG pathways (v6.2) and Reactome  
231 (v67). To perform gene enrichment analysis, over-representation analysis using a hypergeometric test was performed.

232 **Transcription start site prediction of miRNA-encoding genes.** A bioinformatic approach was used to identify TSSs of miRNA-  
233 encoding genes of interest. GRO-seq shows sharp peaks around TSSs in both the sense and antisense directions and a continuous  
234 signal of lower intensity throughout the entire transcript allowing to map TSS of transient transcripts. To map miRNA TSSs, six  
235 human (SRR014283, SRR574824, SRR1015583, SRR1145822, SRR1745515, SRR2961002) (17–21) and nine mouse (SRR097858,  
236 SRR097863, SRR097864, SRR1517780, SRR1772450, SRR1991266, SRR3051599, SRR3051601, SRR5816144) (22–27) GRO-seq  
237 datasets deposited in the Gene Expression Omnibus (GEO) were used. To download the datasets the FASTQdump (v2.8.2)  
238 tool was used, FASTQC (v0.11.4) tool to examine the quality of the datasets, STAR (v2.5.2b) to perform the read alignment  
239 and HOMER (v4.10) to perform peak analysis (28). Integration of miRNA TSSs from all datasets resulted in the list of unique  
240 miRNA TSSs.

241 **Transcription factor binding site prediction.** As promoter regions of miRNA-encoding genes, we considered regions 1000 bp  
 242 downstream of a TSS and 500 bp upstream of a TSS. To identify transcription factors which can potentially bind to the  
 243 miRNA-encoding gene promoters, FIMO (v4.12.0), part of the MEME suite, was used (29). JASPAR CORE (v7), which  
 244 contains a curated, non-redundant set of profiles derived from published and experimentally defined transcription factor binding  
 245 sites for eukaryotes, was used as motif database (30). To refine the prediction two RNA-seq datasets (GSE78853 - inactive  
 246 (vehicle treated) and activated (TGF- $\beta$  treated) hepatic stellate cells (31) and GSE93313 - quiescent and inactive pancreatic  
 247 stellate cell lines) (32) were used. Dataset GSE78853 was downloaded as raw reads and processed using DESeq2 (v1.22.2),  
 248 while dataset GSE93313 was downloaded as table of differentially expressed genes. The code for the bioinformatic analysis  
 249 outlined here is available in the following url: [https://ivanawinkler.github.io/mirna\\_paper/](https://ivanawinkler.github.io/mirna_paper/).

250 **TCGA data processing.** The data used for this analysis were generated by the TCGA Research Network: <http://cancergenome.nih.gov/>.

251  
 252 TCGA's sRNA-seq, RNA-seq, methylation data and copy number variation (CNV) data for HCC, LUAD, LUSC and BRCA  
 253 together with the corresponding metadata were downloaded from the TCGA data portal.

254 sRNA-seq and RNA-seq data were downloaded as raw reads and processed further using DESeq2 (v1.22.2). As not every  
 255 tumor sample has a corresponding control sample, normalised reads of control samples were averaged and reads of individual  
 256 tumor samples were compared to this average control value. To generate normalised reads, DESeq2 package was used.

257 CNV probe values were mapped to genes and normalised to the value of 2, which was taken as reference gene copy number.  
 258 To process CNV data, R package CNTools was used.

259 Beta values of probes in the methylation dataset were mapped to the genes. Beta values of control samples were averaged  
 260 and compared to beta values of individual tumor samples.

261 The code for the bioinformatic analysis outlined here is available in the following url: [https://ivanawinkler.github.io/mirna\\_paper/](https://ivanawinkler.github.io/mirna_paper/).

262 **Analysis of miRNA-mRNA interactions across fibrotic cancers.** To assess if a subset of miRNAs regulates common mRNAs  
 263 across diverse cancer types, the multivariate linear regression approach introduced by *Jacobsen et al.* (33) was used.

264 For every pair  $(k, l)$  of mRNA  $k$  and miRNA  $l$  of interest and a given tumor type, the following regression model was  
 265 employed. Let  $y = (y_i) \in \mathbf{R}^n$ ,  $i = 1, \dots, n$  be the expression of mRNA  $k$  for all  $n$  samples of a given cancer type.  $y$  is then  
 266 modeled as the dependent variable in a linear regression with CNV intensities,  $x_{cnv} = (x_{cnv,i})$ , DNA methylation beta fold  
 267 changes,  $x_{me} = (x_{me,i})$  and expression of miRNA  $l$ ,  $x_l = (x_{l,i})$  as independent variables where  $i = 1, \dots, n$  again denote the  $n$   
 268 tumor samples of a given cancer type:

$$269 \quad y_i = \beta_0 + \beta_{cn}x_{cn,i} + \beta_{me}x_{me,i} + \beta_l x_{l,i} \quad , \quad i = 1, \dots, n \quad [1]$$

270 Here,  $\beta_0$  is the intercept,  $\beta_{cn}$ ,  $\beta_{me}$  and  $\beta_l$  are the regression coefficients for the CNV, methylation and miRNA expression  
 271 covariates, respectively. The model was fitted using the standard assumptions of multivariate regression with the Python  
 272 (v3.6.7) package *statsmodels* (v0.9.0). As described in (33) a t-test can be used to assess miRNA regulation influence and  
 273 a rejection of the null hypothesis  $H_0 : \beta_l = 0$  at  $\alpha = 0.05$  after Benjamini-Hochberg multiple testing correction indicates a  
 274 regulation of mRNA  $k$  by miRNA  $l$ .

275 The rank-statistic approach described in (33) was used to evaluate the relative strength of miRNA:mRNA association across  
 276 the different cancer types, giving an indication of consistent dysregulation patterns of miRNA:mRNA pairs.

277 For a given cancer type  $c$ , mRNA  $k$  and miRNA  $l$ , let  $L_{l,c} = (r_{k,l,c})_k$  be the ordered list of miRNA regression coefficients  
 278 across all mRNAs, from largest negative to largest positive. Then, (33) defines the rank  $rr_{k,l,c}$  of mRNA-miRNA pair  $(k, l)$  in  
 279 cancer type  $c$  as

$$280 \quad rr_{k,l,c} = \frac{r_{k,l,c}}{|L_{l,c}|} - \frac{1}{2 \cdot |L_{l,c}|} \quad [2]$$

281 Under the assumptions detailed by (33) the one-sided null hypothesis that no negative association of mRNA-expression and  
 282 miRNA-expression exists can be formulated as  $H_0 : -2 \sum_c \ln(rr_{k,l,c}) \sim \chi_{2n}^2$  where  $\chi_{2n}^2$  denotes a chi-squared distribution with

283  $2n$  degrees of freedom. For every pair mRNA-miRNA pair  $(k, l)$  we thus obtain a p-value  $p_+^{k,l}$  representing the strength of  
 284 negative association of expression. Similarly, by reversing the ranks  $rr_{k,l,c}$  via  $|L_{l,c}| - rr_{k,l,c} + 1$  one obtains a p-value  $p_-^{k,l}$   
 285 measuring positive association of expression across cancer types.  $p_-^{k,l}$  and  $p_+^{k,l}$  for all mRNA-miRNA pairs again were corrected  
 286 for multiple hypothesis testing via Benjamini-Hochberg. (33) then define the REC-score (cross-cancer association recurrence  
 287 score) for every mRNA-miRNA pair as follows:

$$288 \quad REC_{k,l} = \begin{cases} 2 \log_{10}(p_-^{k,l}) & \text{if } p_-^{k,l} < p_+^{k,l} \\ -2 \log_{10}(p_+^{k,l}) & \text{if } p_+^{k,l} < p_-^{k,l} \\ 0 & \text{otherwise} \end{cases} \quad [3]$$

289 Correspondingly, a negative REC-score represents an expected miRNA:mRNA expression association pattern, i.e. upregulated  
 290 miRNA and downregulated mRNA or downregulated miRNA and upregulated mRNA expression.

291 Processing of the TCGA data used to fit the model is described in section *TCGA data processing*.

292 The code for the bioinformatic analysis outlined here is available in the following url: [https://ivanawinkler.github.io/mirna\\_paper/](https://ivanawinkler.github.io/mirna_paper/).

293 **Data analysis and visualisation.** To perform statistical analysis, R (<https://cran.r-project.org/>) was used. R packages, used  
294 for specific bioinformatic analysis, are listed in the respective section where the used methods are described. Majority of the  
295 graphs were plotted using the ggplot2 package, with exception of the circos plot, for which the circlize package was used. To  
296 generate the model sub-figure (Figure 8), the Servier medical art collection (<https://smart.servier.com/>) was used.

297 Statistical analyses of data acquired are described in the Method detail section of each experimental method. A summary of  
298 statistical analyses is shown in Additional data table S1.

299 **Ethics approval and consent to participate.** Experiments involving *SRF-VP16<sup>ΔHep</sup>* mouse model were approved by Regierungsprä-  
300 sidium Tübingen (IM1/14 permit). Experiments involving CCl<sub>4</sub> animal model complied with the guidelines for animal care  
301 and were approved by the German Animal Care Committee and the Landesamt für Umwelt und Naturschutz (LANUV,  
302 Recklinghausen, Germany) under permit no. Az.: 84-02.04.2012.A092. Permission to isolate pHSC from mice using the  
303 perfusion protocol was given by the LANUV under permit no.: Az.: 84.02.04.2015.A028.

304 **Availability of data and materials.** The code for the bioinformatic analysis outlined in the Material and method part is available  
305 in the following url: [https://ivanawinkler.github.io/mirna\\_paper/](https://ivanawinkler.github.io/mirna_paper/).

306 sRNA-seq and RNA-seq FASTQ data are deposited in NCBI Sequence Read Archive (SRA) under following accession  
307 number, Bioproject: PRJNA522967. Processed sRNA-seq and RNA-seq (differential gene and miRNA expression table and  
308 normalised reads) are listed in supplementary material. Output data of the linear regression analysis are, as well, listed in  
309 Supplementary material.

310 Stable Ppar $\gamma$ -overexpressing GRX cell lines and stable Lin28a-overexpressing NIH/3T3 are available upon request. Further  
311 information and requests for resources and reagents should be directed to and will be fulfilled by the corresponding author  
312 Alfred Nordheim ([alfred.nordheim@uni-tuebingen.de](mailto:alfred.nordheim@uni-tuebingen.de)).

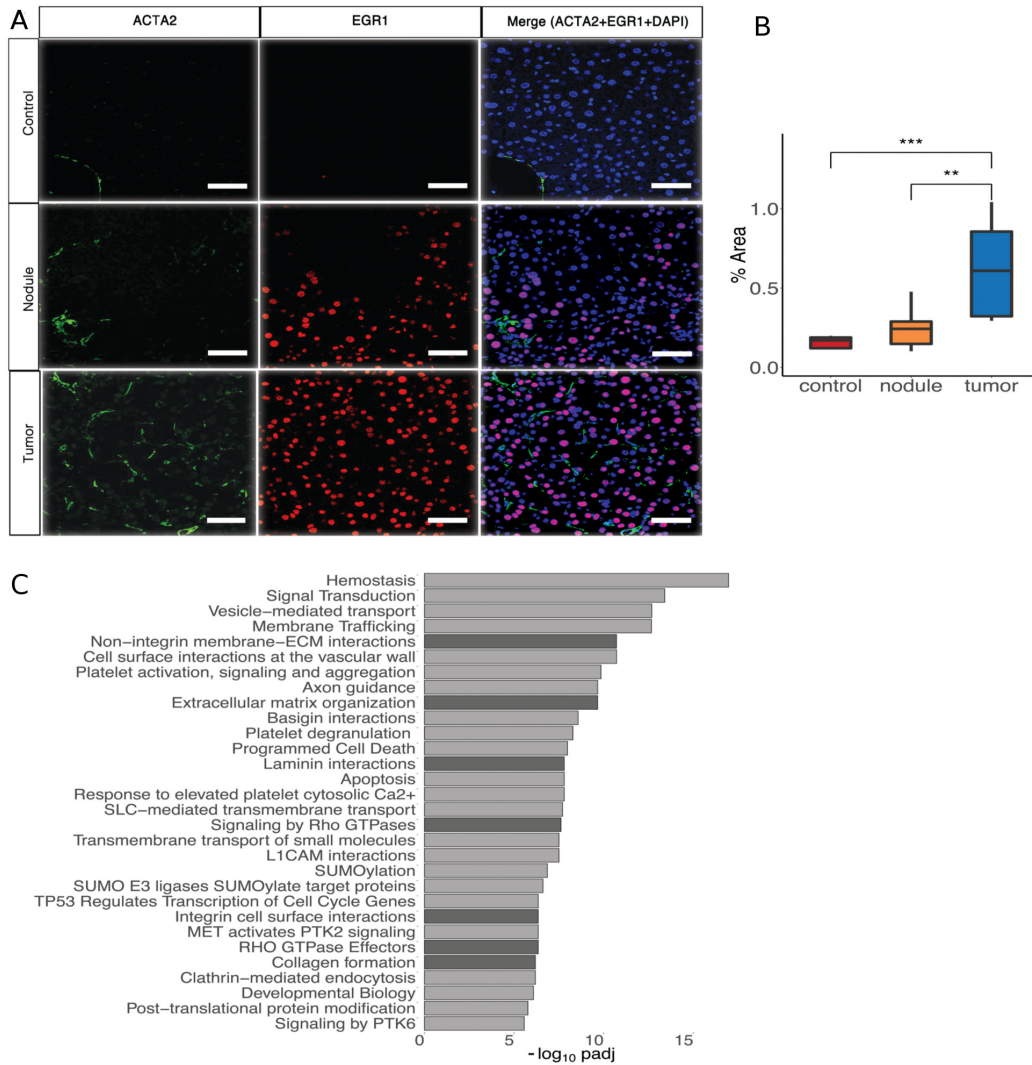

**Fig. S1. A subset of miRNAs targets ECM-linked and fibrosis-associated genes in mHCC.** (A) Acta2 (aHSCs), Egr1 (SRF-VP16 expressing hepatocytes) and merge (all cells) of control, nodular and tumor liver samples isolated from *SRF-VP16<sup>iHep</sup>* mice. Scale 50  $\mu\text{m}$ . (B) Quantification of Acta2 signal shown in B. (C) Gene set enrichment analysis of target genes of downregulated miRNAs found to be conserved in murine (*SRF-VP16<sup>iHep</sup>*) and human (TCGA) HCCs. Pathways depicted by bars in dark grey represent ECM- and Rho GTPase-related pathways. Data are shown as median, first and third quartile ("box") and 95% confidence interval of median ("whiskers"). \* p-value  $\leq 0.05$ , \*\* p-value  $\leq 0.01$ , \*\*\* p-value  $\leq 0.001$ .



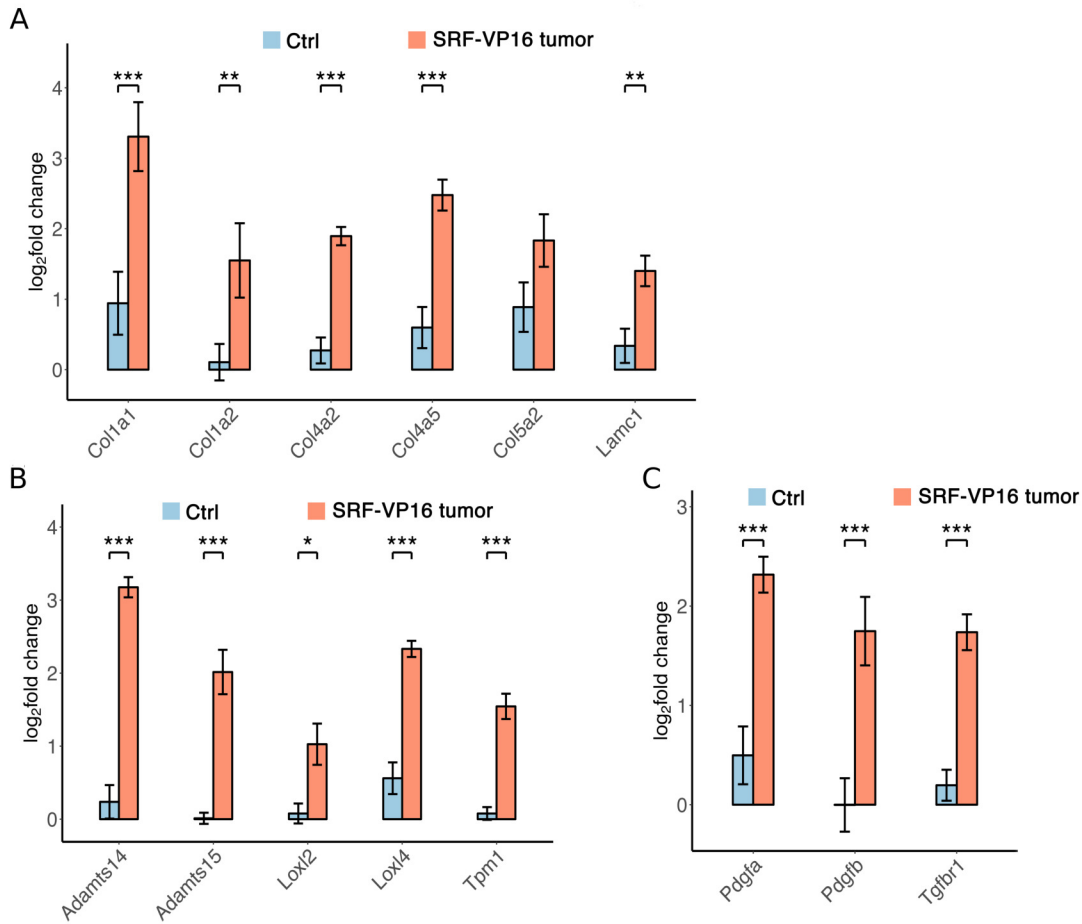

**Fig. S2. AF-miRNAs are downregulated and fibrosis-associated genes are upregulated in murine HCC.** (A-C) Normalized read count (log<sub>2</sub>-transformed) of fibrosis-associated, structural (A), remodeling (B) and signaling (C) genes of the ECM in control and tumor samples of *SRF-VP16<sup>ΔHep</sup>* mice. All samples are normalized to a randomly chosen control sample. Data are shown as mean and standard error of the mean.  $p_{\alpha,d_j}$ -value  $\leq 0.05$ , \*\*  $p_{\alpha,d_j}$ -value  $\leq 0.01$ , \*\*\*  $p_{\alpha,d_j}$ -value  $\leq 0.001$ .

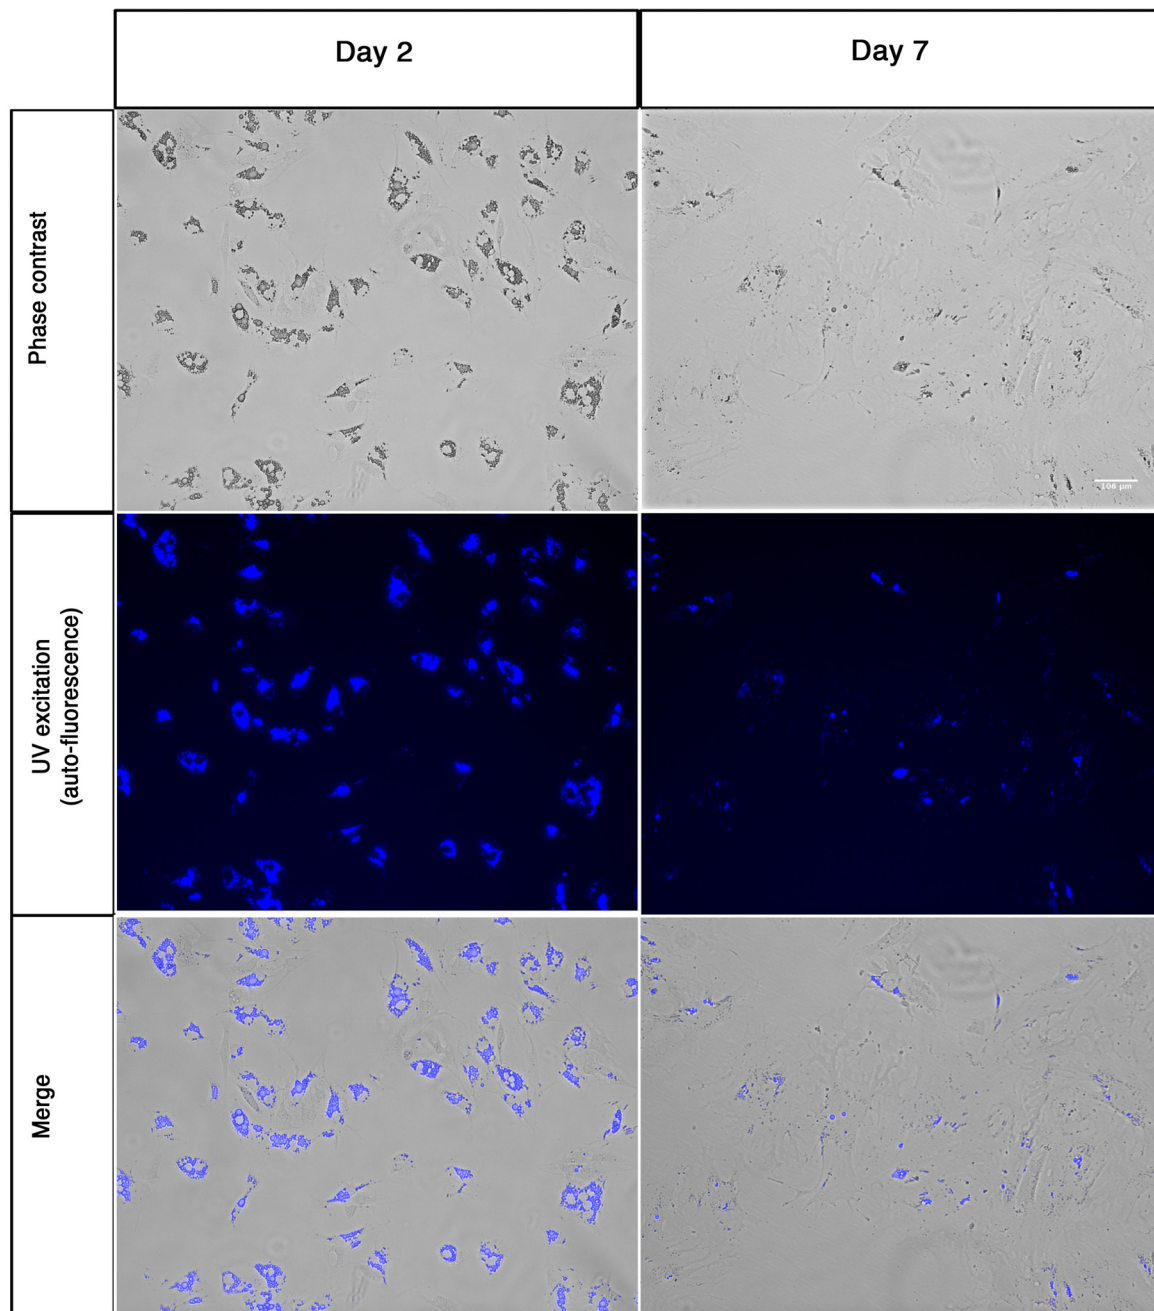

**Fig. S3. pHSC are spontaneous activated as a result of prolonged growth in standard plastic cell culture dishes.** Upper row shows changes in morphology of pHSCs upon culturing, as visualized by phase contrast microscopy. Middle row shows auto-fluorescence of retinoid droplets in cytoplasm of pHSCs upon UV excitation. Auto-fluorescence of retinoid droplets is diminished at day 7 of pHSC culturing, indicating activation of pHSCs. Bottom row shows merge of upper and middle rows.

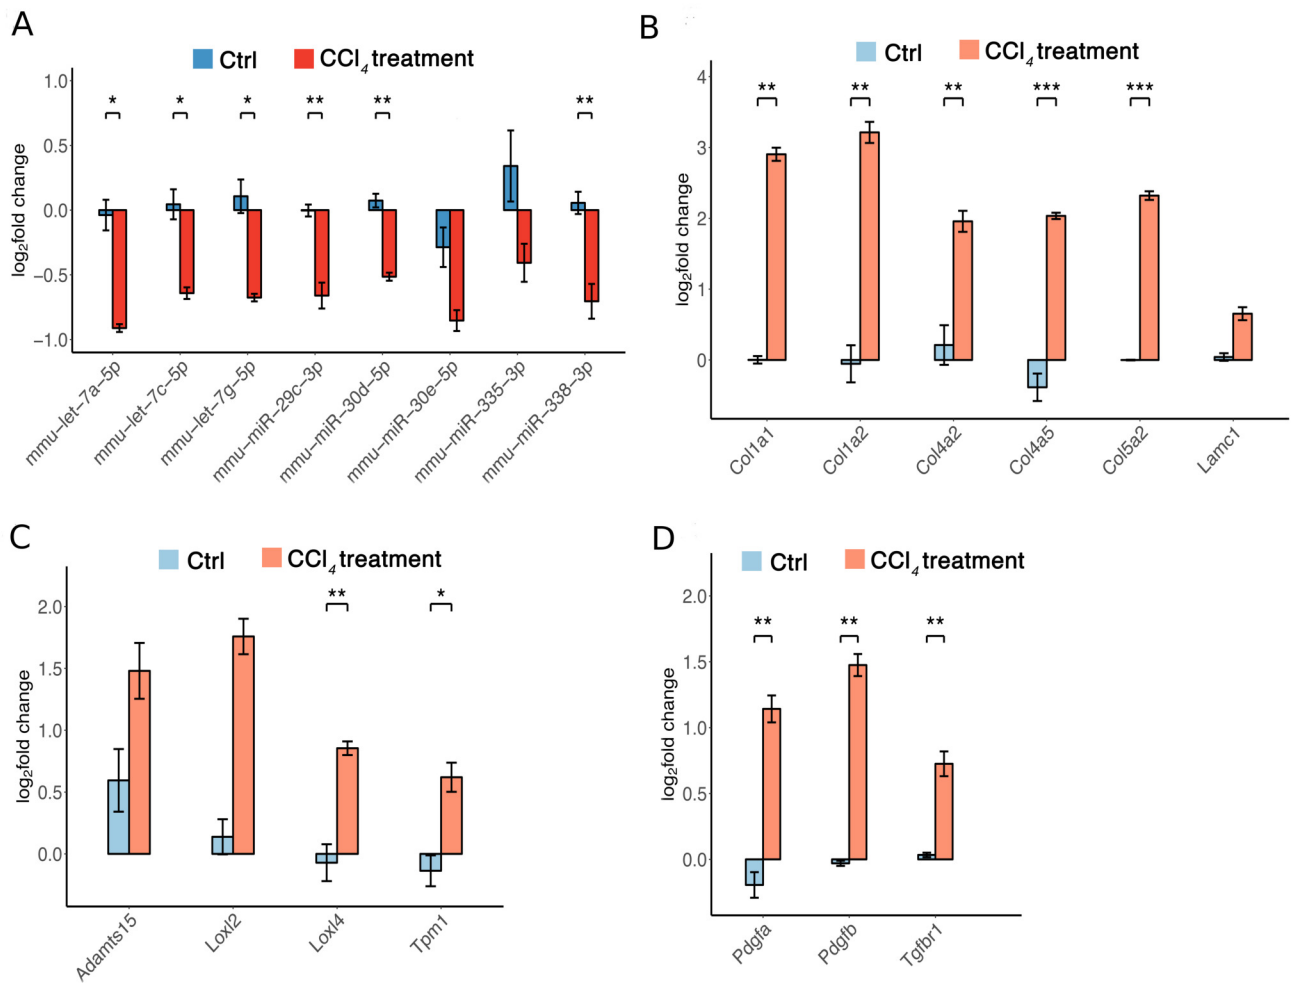

**Fig. S4. AF-miRNAs are downregulated and fibrosis-associated genes are upregulated in mouse CCl<sub>4</sub> fibrosis models.** (A) Relative expression of mature miRNAs in samples of CCl<sub>4</sub>-treated mice in comparison to controls (mineral oil treatment). (B-D) Relative expression of fibrosis-associated, structural (B), remodeling (C) and signaling (D) genes of the ECM in CCl<sub>4</sub>-treated and control mice. All samples are normalized to a randomly chosen control sample. Data are shown as mean and standard error of the mean. \* p-value ≤ 0.05, \*\* p-value ≤ 0.01, \*\*\* p-value ≤ 0.001.

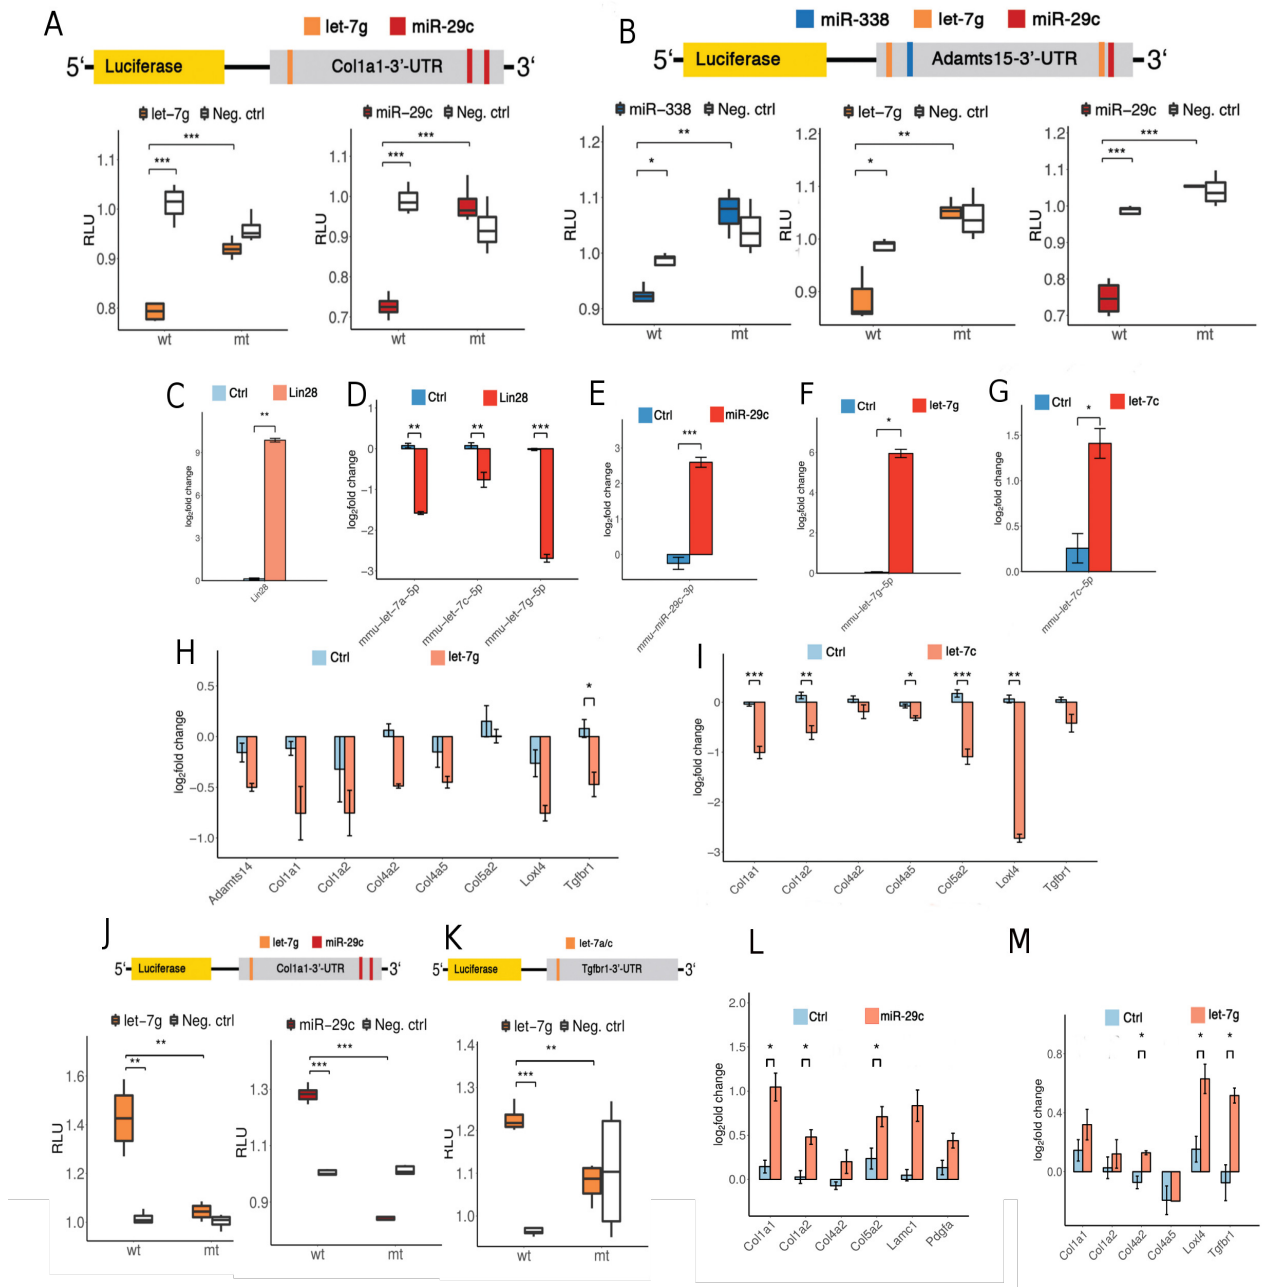

**Fig. S5. AF-miRNAs target structural, signaling and remodeling components of the ECM.** (A-B) Activities of wild-type and mutant (mutated miRNA site) 3'-UTR-luciferase constructs derived from: (A) *Col1a1* in NIH/3T3 cells transfected with let-7g, miR-29c and scrambled miRNA mimic (Neg. ctrl) and (B) *Adamts15* in NIH/3T3 cells transfected with miR-338, let-7g, miR-29c and scrambled miRNA mimic. Let-7g-, miR-29c- and miR-338-transfected samples are colored in the plots according to the luciferase construct schematic. Samples transfected with scrambled miRNA mimic are shown in white. (C-D) Relative expression of: (C) *Lin28a*, (D) let-7a, let-7c and let-7g in stable *Lin28a*-overexpressing NIH/3T3 cells. (E-G) Relative expression of (E) miR-29c, (F) let-7g and (G) let-7c in NIH/3T3 cells transfected with miR-29c, let-7g or let-7c mimics, respectively. (H-I) Relative expression of putative (H) let-7g and (I) let-7c target genes associated with fibrosis in NIH/3T3 cells transfected with let-7g and let-7c mimics, respectively. (J-K) Activities of wild-type and mutant (mutated miRNA site) 3'-UTR-luciferase constructs derived from: (J) *Col1a1* in NIH/3T3 cells transfected with miR-29c inhibitors, let-7g inhibitors and scrambled miRNA inhibitors (Neg. ctrl) and (K) *Tgfb1* in NIH/3T3 cells transfected with let-7g inhibitors and scrambled miRNA inhibitors. (L-M) Relative expression of putative (L) miR-29c and (M) let-7g target genes associated with fibrosis in NIH/3T3 cells transfected with inhibitors of miR-29c and let-7g, respectively. (A-B, J-K) Data are shown as median, first and third quartile ("box") and 95% confidence interval of median ("whiskers"). (C-I, L-M) Data are shown as mean and standard error of the mean. \* p-value  $\leq 0.05$ , \*\* p-value  $\leq 0.01$ , \*\*\* p-value  $\leq 0.001$ .

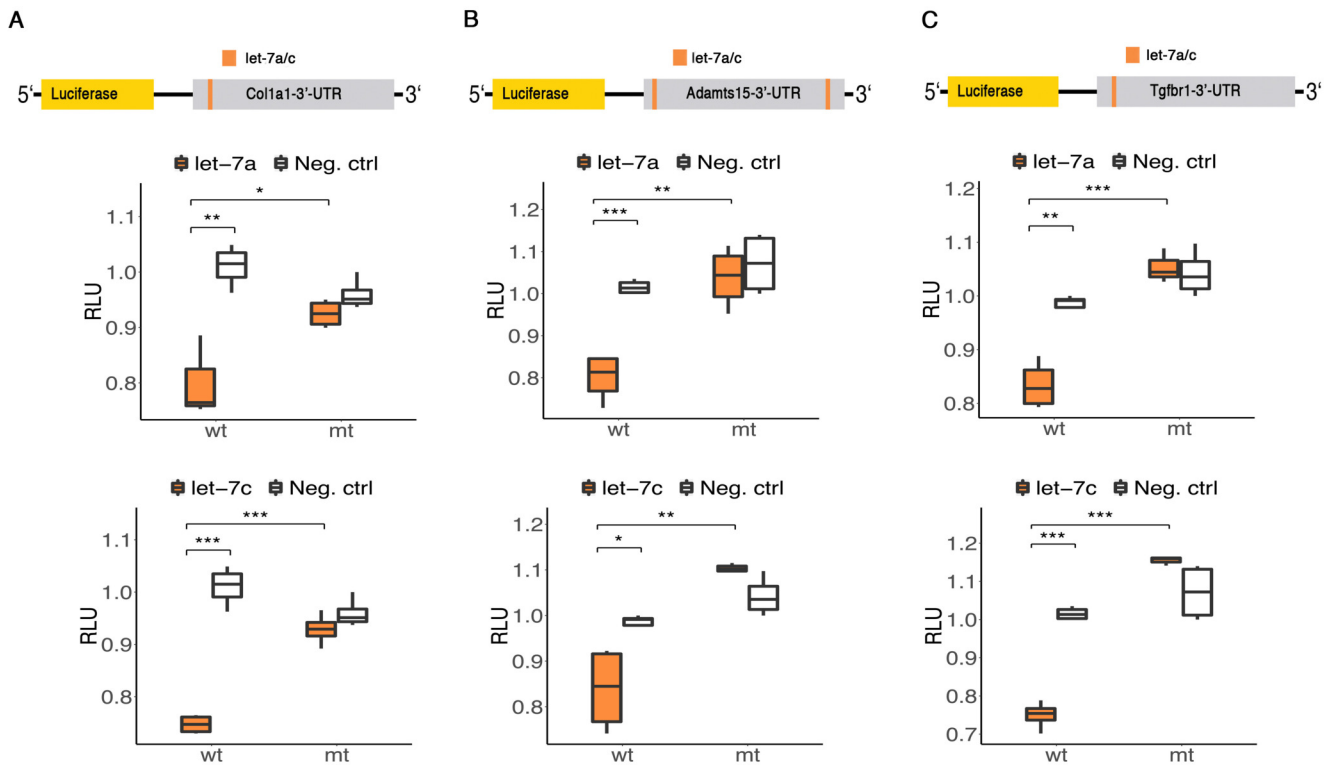

**Fig. S6. Let-7 targets fibrosis-associated genes.** (A-C) Measurement of the activities of wild-type and mutant (mutated miRNA interaction site) 3'-UTRs luciferase constructs derived from: (A) *Col1a1*, (B) *Adamts15* and (C) *Tgfb1* genes in NIH/3T3 cells transfected with let-7a, let-7c and scrambled miRNA mimic (Neg. ctrl). Data are shown as median, first and third quartile ("box") and 95% confidence interval of median ("whiskers"). \* p-value  $\leq 0.05$ , \*\* p-value  $\leq 0.01$ , \*\*\* p-value  $\leq 0.001$ .

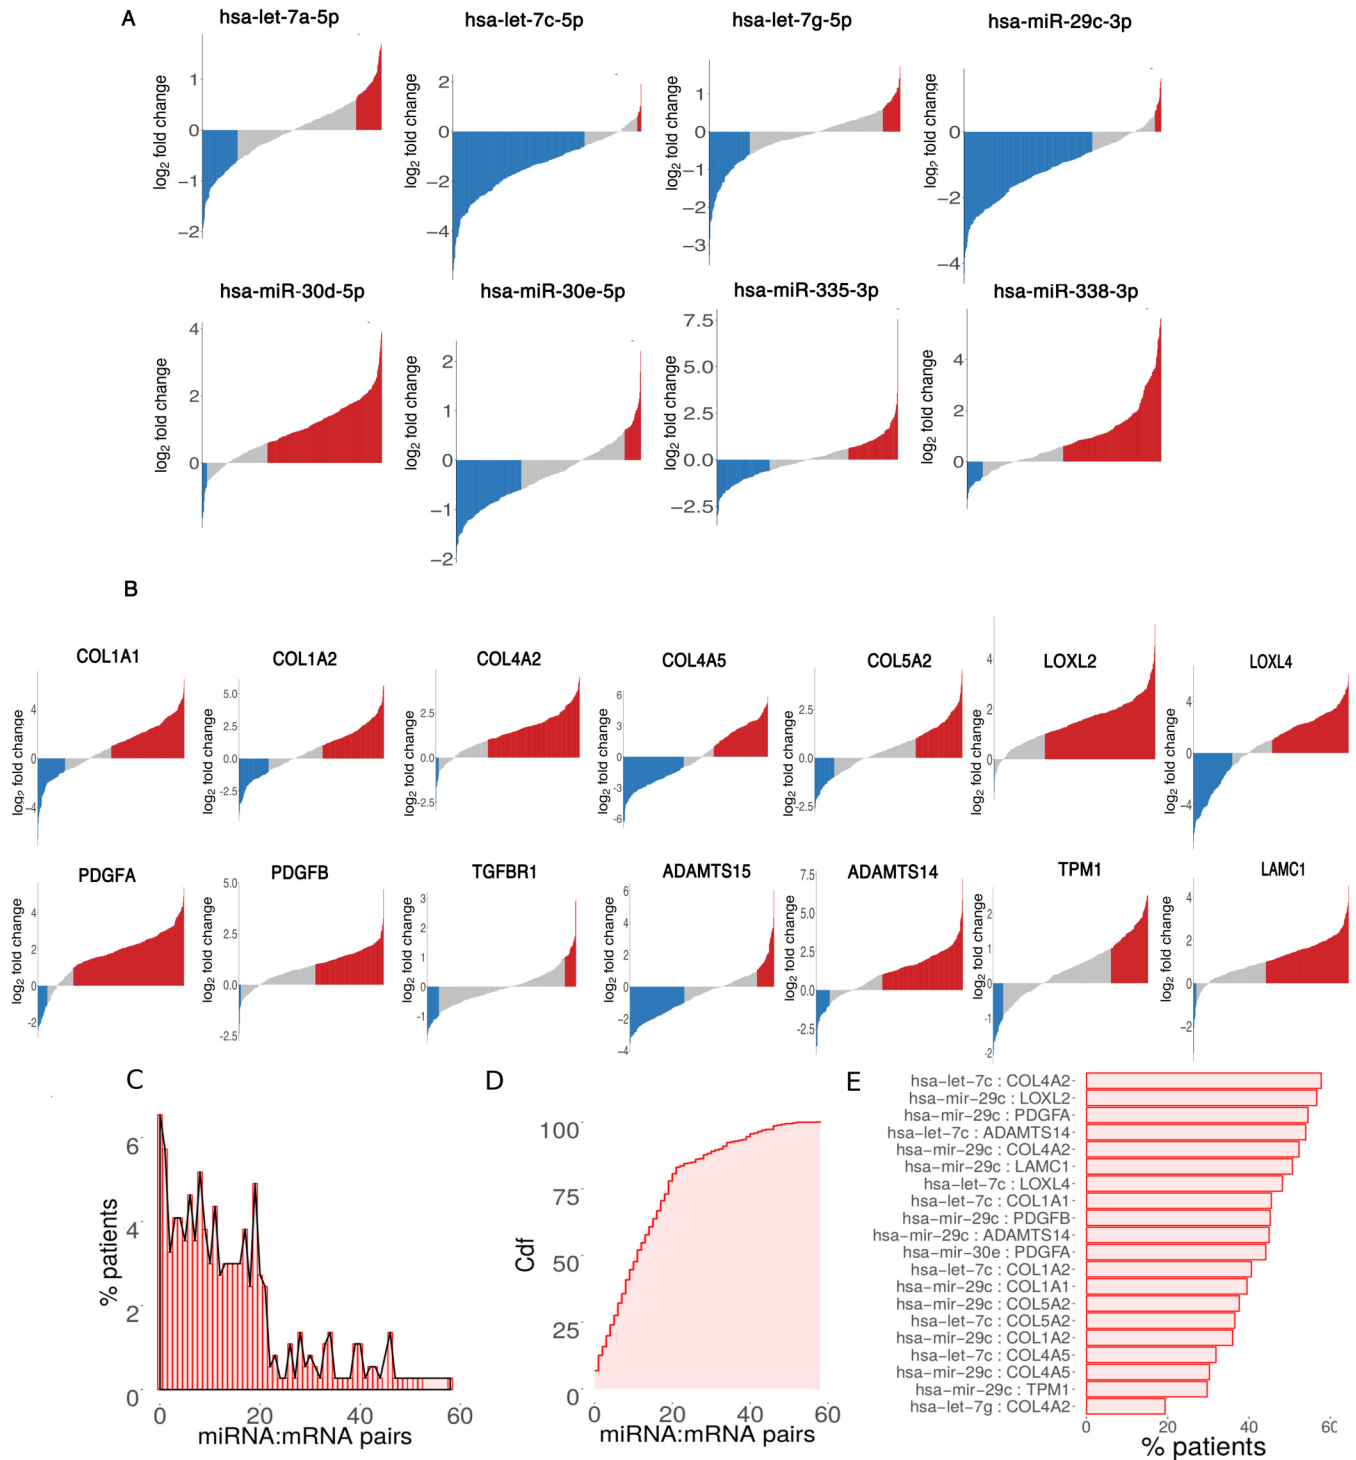

**Fig. S7. AF-miRNAs are downregulated and fibrosis-associated genes are upregulated in a subset of human HCCs.** (A) Log<sub>2</sub>-fold changes of AF-miRNAs in individual tumors (compared to the mean control value) of the human TCGA dataset. Bars in waterfall plot: blue (miRNA downregulation  $\geq 1.5$ -fold), red (miRNA upregulation  $\geq 1.5$ -fold). (B) Log<sub>2</sub>-fold changes of fibrosis-associated genes in individual tumors (compared to the mean control value) of the human TCGA dataset. Bars in waterfall plot: blue (mRNA downregulation  $\geq 2$ -fold), red (mRNA upregulation  $\geq 2$ -fold). (C) Number of AF-miRNA and fibrosis-associated gene (mRNA) pairs conserved in each individual patient. (D) Cumulative distribution function (Cdf) of patients with a number of conserved AF-miRNA and fibrosis-associated gene (mRNA) pairs. (E) Top 20 AF-miRNA and fibrosis-associated gene (mRNA) pairs conserved across patients of the TCGA cohort. (C-E) miRNAs are considered downregulated if their expression is  $\geq 1.5$ -fold downregulated in comparison to mean control value and mRNAs upregulated if their expression is  $\geq 1.5$ -fold upregulated.

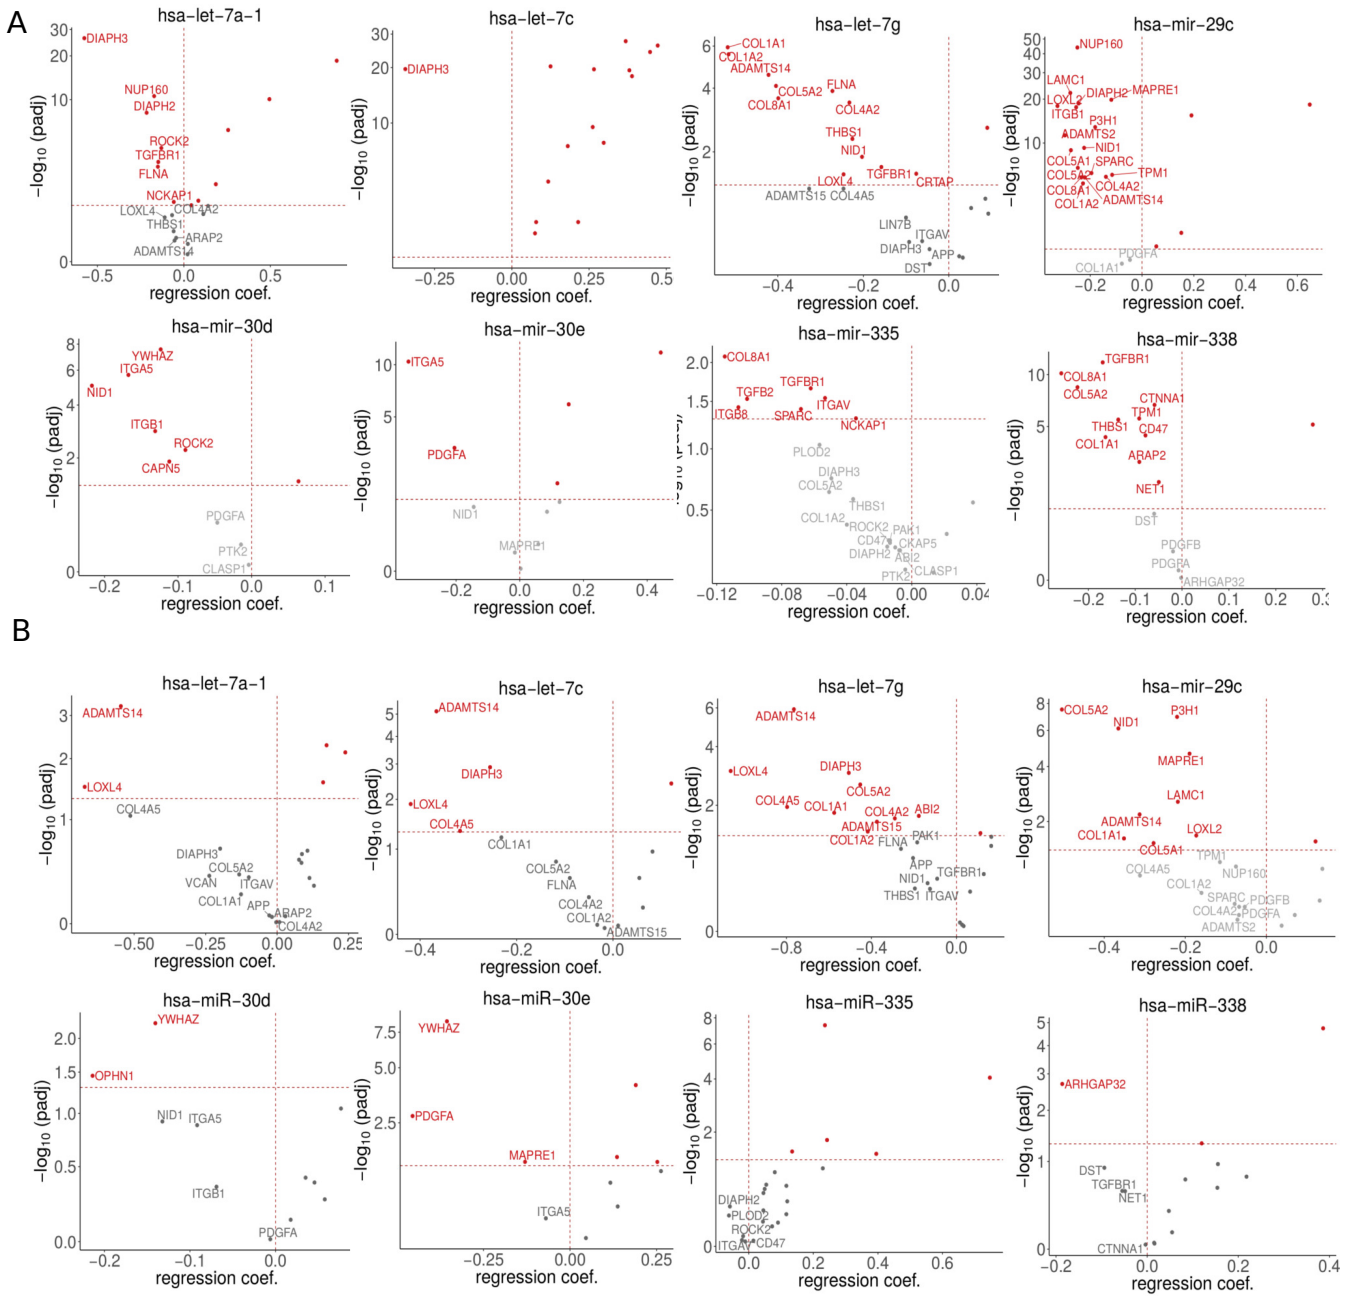

**Fig. S8. miRNA:mRNA pairs in human BRCA and HCC show different degrees of association in comparison to other fibrosis-facilitated carcinomas.** (A) Each plot shows recurrence of expression association of the particular miRNA  $l$  and its ECM-related target mRNA in human invasive breast carcinomas defined by regression coefficient  $\beta_1$  and corresponding  $p_{adj}$  value. The relationship of miRNA to individual mRNA was evaluated using the multivariate linear model which factors in: miRNA and mRNA expression, changes in DNA copy number (CNV) and promoter methylation status of the protein-coding genes. CNV and methylation data are used to assess the influence of miRNA-unrelated gene regulation. (B) Each plot shows recurrence of expression association of the particular miRNA and its ECM-related target mRNA in human HCCs defined by regression coefficient and corresponding  $p_{adj}$  value. Target genes having a  $p_{adj}$  value of miRNA:mRNA association assessment of  $\leq 0.05$  are represented in red. Gene names are displayed if their regression coef.  $\beta_1$  has negative value. \* p-value  $\leq 0.05$ , \*\* p-value  $\leq 0.01$ , \*\*\* p-value  $\leq 0.001$ .

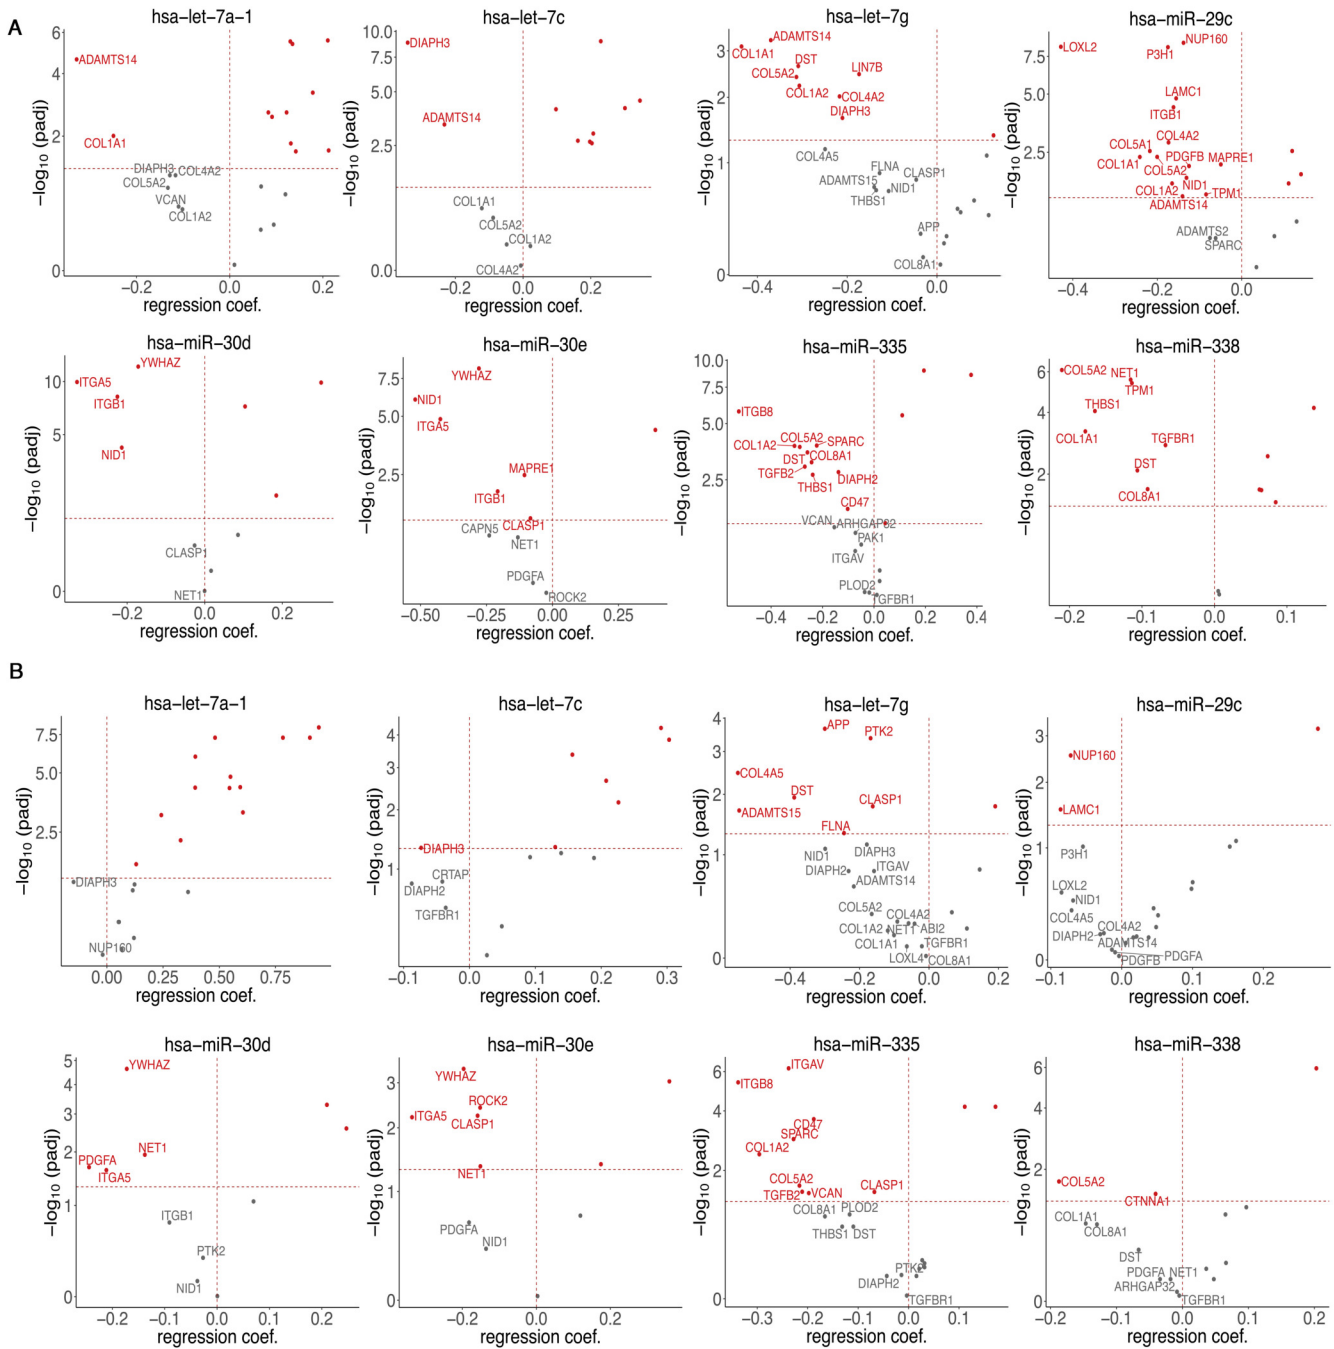

**Fig. S9.** miRNA:mRNA pairs in LUAD and LUSC show difference degrees of association in comparison to other fibrosis-facilitated carcinomas. (A-B) Plots show recurrence of expression association of the particular miRNA and its target mRNA in (A) human lung adenocarcinoma and (B) human lung squamous cell carcinoma defined by regression coefficient and corresponding  $p_{adj}$  value. Target genes having a  $p_{adj}$  value of miRNA:mRNA association assessment of  $\leq 0.05$  are represented in red. Gene names are displayed if their regression coef. has a negative value. \*  $p$ -value  $\leq 0.05$ , \*\* $p$ -value  $\leq 0.01$ , \*\*\*  $p$ -value  $\leq 0.001$ .



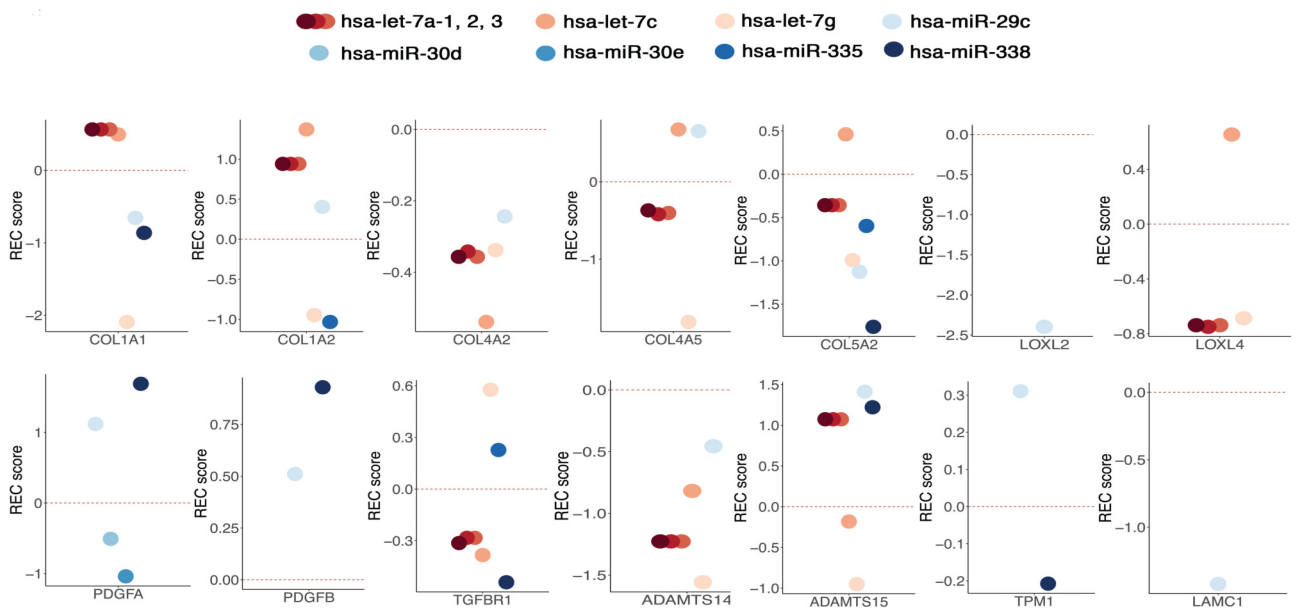

**Fig. S10. The miRNA:mRNA pairs show different degrees of association in human fibrosis-facilitated carcinomas.** Inferred association recurrence (REC) scores of miRNA:mRNA pairs depicted in Figure 1C in fibrosis-facilitated cancers (hepatocellular carcinoma (HCC), invasive breast carcinoma (BRCA), lung adenocarcinoma (LUAD) and lung squamous cell carcinoma(LUSC)). The sign of the REC score indicates the nature of the association, while its magnitude captures the recurrence consistency.

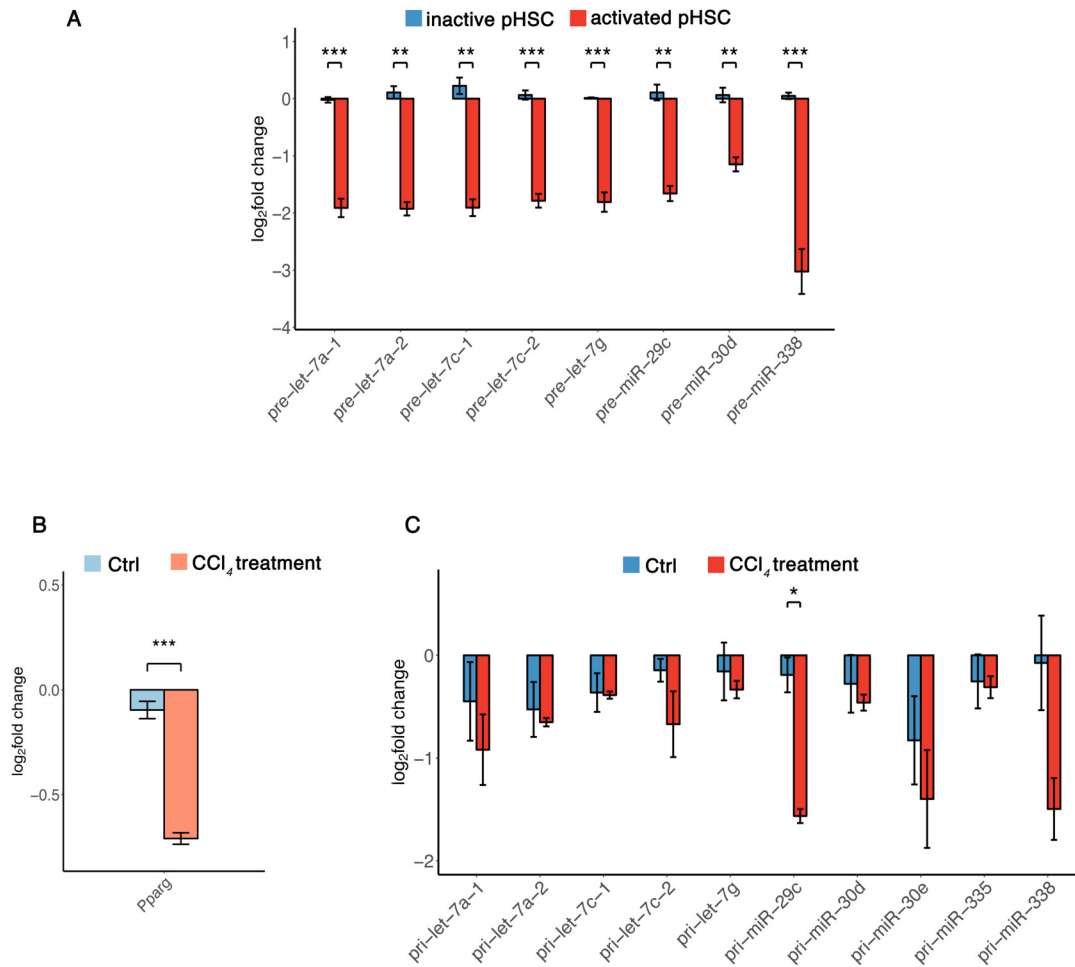

**Fig. S11. Anti-fibrotic pre-miRNAs are downregulated in activated pHSC, as well as pri-miRNA in the murine CCl<sub>4</sub> model.** (A) Relative expression of pre-miRNA in inactive and activated pHSCs. (B-C) Relative expression of: (B) *Pparg* and (C) pri-miRNAs in samples of CCl<sub>4</sub>-treated mice in comparison to controls (mineral oil treatment). Data are shown as mean and standard error of the mean. \* p-value ≤ 0.05, \*\* p-value ≤ 0.01, \*\*\* p-value ≤ 0.001.

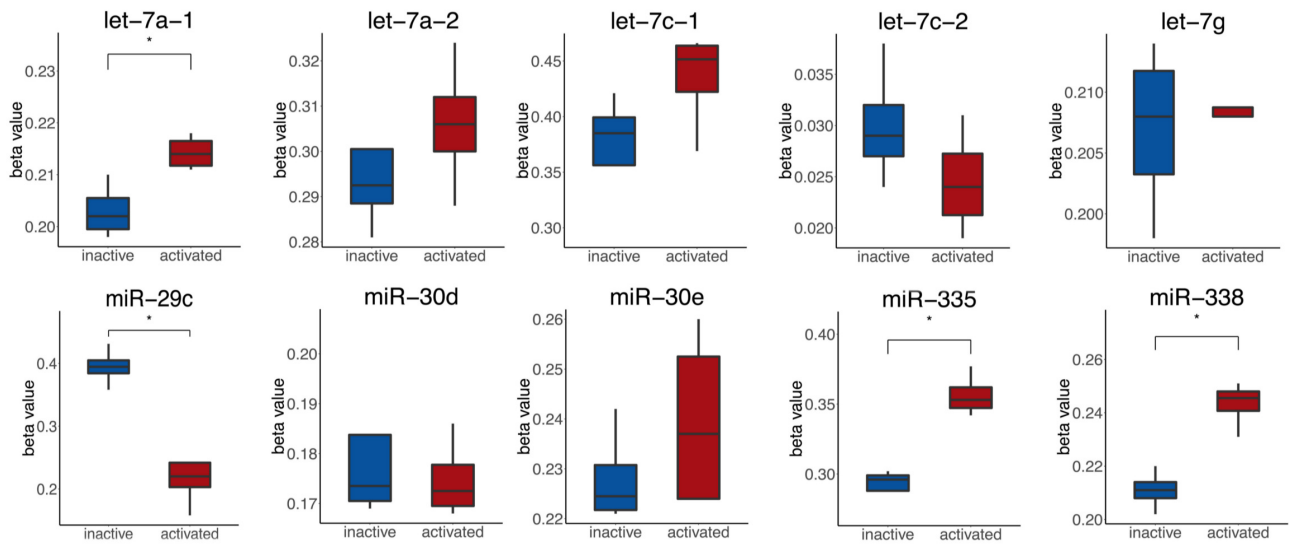

**Fig. S12. DNA methylation of miRNA-encoding gene promoters contributes to regulation of expression of AF-miRNAs.** Differential CpG DNA methylation of promoters of AF-miRNA-encoding genes in inactive and activated pHSCs. Data are shown as median, first and third quartile ("box") and 95% confidence interval of median ("whiskers"). \* p-value  $\leq 0.05$ , \*\* p-value  $\leq 0.01$ , \*\*\* p-value  $\leq 0.001$ .

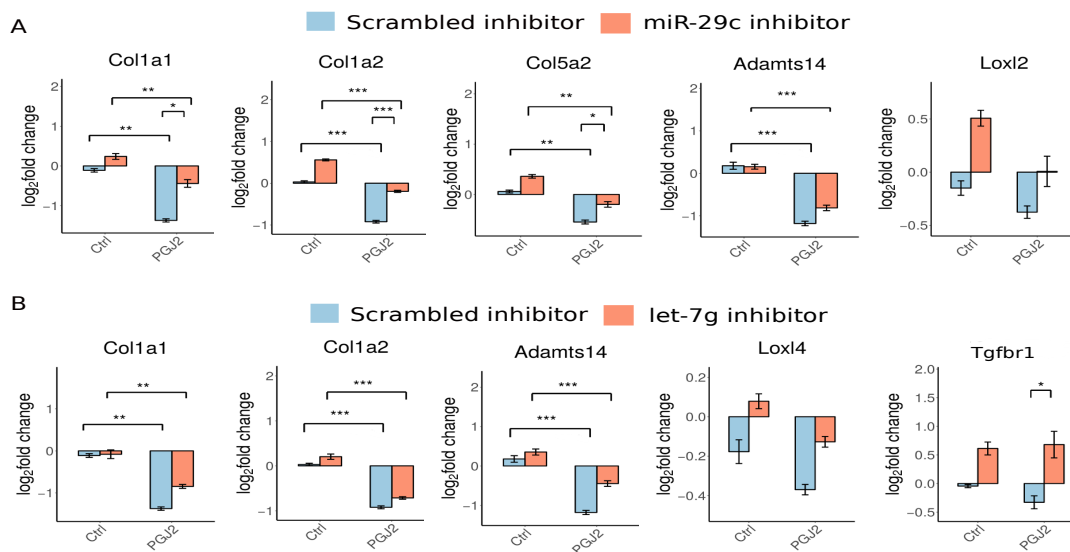

**Fig. S13. Ppar $\gamma$ -mediated expression of miR-29c and let-7g inhibits fibrosis-associated genes.** Relative expression of fibrosis-associated target genes of (A) miR-29c and (B) let-7g upon treatment of stable Ppar $\gamma$ -overexpressing GRX cells with the Ppar $\gamma$  agonist PGJ<sub>2</sub> in the presence of scrambled inhibitor (blue) or miRNA inhibitor (red). Data are shown as mean and standard error of the mean. \* p-value  $\leq$  0.05, \*\* p-value  $\leq$  0.01, \*\*\* p-value  $\leq$  0.001.

**Table S1. List of samples used in omics analyses and their corresponding metadata**

| Litter | Sample | Age/weeks | Gender | Liver-to-body-ratio | Sample type | Experiment           |
|--------|--------|-----------|--------|---------------------|-------------|----------------------|
| 4      | 4-2C   | 32        | F      | 4.8                 | control     | sRNA-seq,<br>RNA-seq |
| 4      | 4-1N   | 32        | F      | 26.3                | nodule      | sRNA-seq,<br>RNA-seq |
| 4      | 4-1T2  | 32        | F      | 26.3                | HCC         | sRNA-seq,<br>RNA-seq |
| 25     | 25-5C  | 32        | F      | 5.1                 | control     | sRNA-seq,<br>RNA-seq |
| 25     | 25-4N  | 32        | F      | 30.1                | nodule      | sRNA-seq,<br>RNA-seq |
| 25     | 25-4T1 | 32        | F      | 30.1                | HCC         | sRNA-seq,<br>RNA-seq |
| 26     | 26-4C  | 31        | F      | 4.2                 | control     | sRNA-seq,<br>RNA-seq |
| 26     | 26-3N  | 31        | F      | 26.8                | nodule      | sRNA-seq             |
| 26     | 26-3T2 | 31        | F      | 26.8                | HCC         | sRNA-seq,<br>RNA-seq |
| 49     | 49-1C  | 52        | M      | 4.9                 | control     | RNA-seq              |
| 49     | 49-2T3 | 52        | M      | 16.4                | HCC         | RNA-seq              |
| 2      | 2-1C   | 32        | M      | 5                   | control     | sRNA-seq             |
| 2      | 2-2N   | 32        | M      | 24.3                | nodule      | sRNA-seq,<br>RNA-seq |
| 2      | 2-2T   | 32        | M      | 24.3                | HCC         | sRNA-seq,<br>RNA-seq |
| 59     | 59-1N  | 30        | M      | 23.4                | nodule      | RNA-seq              |
| 59     | 59-1T1 | 30        | M      | 23.4                | HCC         | RNA-seq              |
| 59     | 59-1T2 | 30        | M      | 23.4                | HCC         | RNA-seq              |
| 59     | 59-1T3 | 30        | M      | 23.4                | HCC         | RNA-seq              |

**Table S2. List of miRNA:mRNA pairs for which targeting was experimentally validated**

| miRNA                                             | Target mRNA | Experiment             |
|---------------------------------------------------|-------------|------------------------|
| mmu-miR-29c-3p                                    | Col1a1      | Luciferase assay, qPCR |
| mmu-miR-29c-3p                                    | Pdgfa       | Luciferase assay, qPCR |
| mmu-miR-29c-3p                                    | Pdgfb       | qPCR                   |
| mmu-miR-29c-3p                                    | Tpm1        | qPCR                   |
| mmu-miR-29c-3p                                    | Col1a2      | qPCR                   |
| mmu-miR-29c-3p                                    | Col4a2      | qPCR                   |
| mmu-miR-29c-3p                                    | Col4a5      | qPCR                   |
| mmu-miR-29c-3p                                    | Col5a2      | qPCR                   |
| mmu-let-7a-5p,<br>mmu-let-7c-5p,<br>mmu-let-7g-5p | Col1a1      | Luciferase assay, qPCR |
| mmu-let-7a-5p,<br>mmu-let-7c-5p,<br>mmu-let-7g-5p | Adamts15    | Luciferase assay, qPCR |
| mmu-let-7a-5p,<br>mmu-let-7c-5p,<br>mmu-let-7g-5p | Tgfb1       | Luciferase assay, qPCR |
| mmu-let-7a-5p,<br>mmu-let-7c-5p,<br>mmu-let-7g-5p | Col4a2      | qPCR                   |
| mmu-let-7a-5p,<br>mmu-let-7c-5p,<br>mmu-let-7g-5p | Col4a5      | qPCR                   |
| mmu-let-7a-5p,<br>mmu-let-7c-5p,<br>mmu-let-7g-5p | Col5a2      | qPCR                   |
| mmu-let-7a-5p,<br>mmu-let-7c-5p,<br>mmu-let-7g-5p | Col1a2      | qPCR                   |
| mmu-miR-338-3p                                    | Col1a1      | Luciferase assay       |
| mmu-miR-338-3p                                    | Adamts15    | Luciferase assay       |

**Table S3. List of the miRNA:mRNA interactions, assays in which the interactions were validated and REC scores**

| Gene            | miRNA   | luciferase    | qPCR          | REC score |
|-----------------|---------|---------------|---------------|-----------|
| <i>Pdgfa</i>    | miR-29c | y (validated) | y (validated) | positive  |
| <i>Adamts14</i> | miR-29c | n             | y (validated) | negative  |
| <i>Col1a1</i>   | miR-29c | y (validated) | y (validated) | negative  |
| <i>Col1a2</i>   | miR-29c | n             | y (validated) | positive  |
| <i>Col4a2</i>   | miR-29c | n             | y (validated) | negative  |
| <i>Col5a2</i>   | miR-29c | n             | y (validated) | negative  |
| <i>Lamc1</i>    | miR-29c | n             | y (validated) | negative  |
| <i>Tpm1</i>     | miR-29c | n             | y (validated) | positive  |
| <i>Adamts15</i> | miR-29c | y (validated) | n             | positive  |
| <i>Tgfb1</i>    | let-7g  | y (validated) | y (validated) | positive  |
| <i>Col1a1</i>   | let-7g  | y (validated) | y (validated) | negative  |
| <i>Adamts15</i> | let-7g  | y (validated) | n             | negative  |
| <i>Adamts14</i> | let-7g  | n             | y (validated) | negative  |
| <i>Col1a2</i>   | let-7g  | n             | y (validated) | negative  |
| <i>Col4a2</i>   | let-7g  | n             | y (validated) | negative  |
| <i>Col4a5</i>   | let-7g  | n             | y (validated) | negative  |
| <i>Col5a2</i>   | let-7g  | n             | y             | negative  |
| <i>Loxl4</i>    | let-7g  | n             | y (validated) | negative  |
| <i>Adamts15</i> | let-7a  | y (validated) | n             | positive  |
| <i>Col1a1</i>   | let-7a  | y (validated) | n             | positive  |
| <i>Tgfb1</i>    | let-7a  | y (validated) | n             | negative  |
| <i>Col1a1</i>   | let-7c  | y (validated) | y (validated) | positive  |
| <i>Adamts15</i> | let-7c  | y (validated) | n             | negative  |
| <i>Tgfb1</i>    | let-7c  | y (validated) | y (validated) | negative  |
| <i>Col1a2</i>   | let-7c  | n             | y (validated) | positive  |
| <i>Col4a2</i>   | let-7c  | n             | y (validated) | negative  |
| <i>Col4a5</i>   | let-7c  | n             | y (validated) | positive  |
| <i>Col5a2</i>   | let-7c  | n             | y (validated) | positive  |
| <i>Loxl4</i>    | let-7c  | n             | y (validated) | positive  |
| <i>Adamts15</i> | miR-338 | y (validated) | n             | positive  |

**Table S4. List of used vectors and their description**

| Vector                 | Vector description                                                                           |
|------------------------|----------------------------------------------------------------------------------------------|
| pMSCV-Lin28A           | Expression of murine Lin28A                                                                  |
| pmirGLO                | pmirGLO Dual-Luciferase miRNA Target Expression Vector                                       |
| pMSCV                  | empty pMSCV-Lin28A vector (without insert)                                                   |
| pmirGLO-Col1a1         | Expression of Col1a1-3'UTR with predicted let-7 and miR-29c target site in pmirGLO           |
| pmirGLO-Pdgfa          | Expression of Pdgfa1-3'UTR with predicted miR-29c target site in pmirGLO                     |
| pmirGLO-Adamts15       | Expression of Adamts15-3'UTR with predicted let-7 and miR-338 target site in pmirGLO         |
| pmirGLO-Tgfbr1         | Expression of Tgfbr1-3'UTR with predicted let-7 target site in pmirGLO                       |
| pmirGLO-Col1a1-mut     | Expression of Col1a1-3'UTR with mutated predicted let-7 and miR-29c target site in pmirGLO   |
| pmirGLO-Pdgfa-mut      | Expression of Pdgfa1-3'UTR with mutated predicted miR-29c target site in pmirGLO             |
| pmirGLO-Adamts15-mut   | Expression of Adamts15-3'UTR with mutated predicted let-7 and miR-338 target site in pmirGLO |
| pmirGLO-Tgfbr1-mut     | Expression of Tgfbr1-3'UTR with mutated predicted let-7 target site in pmirGLO               |
| pSV Sport PPAR gamma 1 | Expression of mouse Pparg1                                                                   |
| pcDNA3-Egr1            | Expression of mouse Egr1                                                                     |



313 **Additional data table S1 (dataset\_one.xlsx)**

314 Summary of statistical analysis. Related to the figures as listed in the table.

315 **Additional data table S2 (dataset\_two.xlsx)**

316 List of differential expressed sRNAs and genes in SRF-VP16-driven nodular, tumor and corresponding control samples.  
317 (Sheet 1) List of differential expressed sRNAs obtained by sRNA-seq data analysis. List contains Gene ID information of all  
318 detected sRNAs, log<sub>2</sub> fold changes in nodules and tumors compared to controls and corresponding p- and p<sub>adj</sub>-values. (Sheet 2)  
319 Normalized read counts (log<sub>2</sub> transformed) of sRNA in all samples. Read were produced using varianceStabilizingTransformation  
320 function of DESeq2 package. (Sheet 3) List of differential expressed genes obtained by RNA-seq data analysis. List contains  
321 Gene ID information of all detected mRNAs, log<sub>2</sub> fold changes in nodules and tumors compared to controls and corresponding  
322 p- and p<sub>adj</sub>-values. (Sheet 4) Normalized read counts (log<sub>2</sub> transformed) of mRNAs in all samples. Reads were produced using  
323 varianceStabilizingTransformation function of DESeq2 package.

324 **Additional data table S3 (dataset\_three.xlsx)**

325 REC scores of linear regression analyses. (Sheet 1) REC scores of miRNA:mRNA pairs and the corresponding p<sub>adj</sub>-values.  
326 (Sheet 2-5) Regression coef. of miRNA:mRNA pairs and the corresponding p<sub>adj</sub>-values for miRNAs expression, CNV and  
327 methylation values in BRCA (Sheet 2), LIHC (Sheet 3), LUAD (Sheet 4) and LUSC (Sheet 5).

328 **Additional data table S4 (dataset\_four.xlsx)**

329 List of used primers, their sequence and targeted gene/miRNA. (Sheet 1) List of used primers, their sequence and targeted  
330 gene/miRNA. (Sheet 2) Sizes and genomic coordinates of amplicons analyzed in miRNA methylation study.

331 **Additional data table S5 (dataset\_five.xlsx)**

332 AF-miRNA and fibrosis-associated gene (mRNA) pairs conserved across patients of the TCGA cohort.

333 **References**

- 334 1. S Dalton, R Treisman, Characterization of SAP-1, a protein recruited by serum response factor to the c-fos serum response  
335 element. *Cell* **68**, 597–612 (1992).
- 336 2. S Ohrnberger, et al., Dysregulated serum response factor triggers formation of hepatocellular carcinoma. *Hepatology* **61**,  
337 979–989 (2015).
- 338 3. D Scholten, J Trebicka, C Liedtke, R Weiskirchen, The carbon tetrachloride model in mice. *Lab. Anim.* **49**, 4–11 (2015).
- 339 4. S Weiskirchen, CG Tag, S Sauer-Lehnen, F Tacke, R Weiskirchen, Isolation and Culture of Primary Murine Hepatic  
340 Stellate Cells. *Methods Mol. Biol.* **1627**, 165–191 (2017).
- 341 5. R Borojevic, et al., Establishment of a continuous cell line from fibrotic schistosomal granulomas in mice livers. *In Vitro*  
342 *Cell. Dev. Biol.* **21**, 382–390 (1985).
- 343 6. JL Jainchill, SA Aaronson, GJ Todaro, Murine sarcoma and leukemia viruses: assay using clonal lines of contact-inhibited  
344 mouse cells. *J. Virol.* **4**, 549–553 (1969).
- 345 7. U Negmadjanov, et al., TGF- $\beta$ -mediated differentiation of fibroblasts is associated with increased mitochondrial content  
346 and cellular respiration. *PLoS ONE* **10**, e0123046 (2015).
- 347 8. A Dobin, et al., STAR: ultrafast universal RNA-seq aligner. *Bioinformatics* **29**, 15–21 (2013).
- 348 9. MI Love, W Huber, S Anders, Moderated estimation of fold change and dispersion for RNA-seq data with DESeq2.  
349 *Genome Biol.* **15**, 550 (2014).
- 350 10. JM Ruijter, et al., Evaluation of qPCR curve analysis methods for reliable biomarker discovery: bias, resolution, precision,  
351 and implications. *Methods* **59**, 32–46 (2013).
- 352 11. B Daniel, BL Balint, ZS Nagy, L Nagy, Mapping the genomic binding sites of the activated retinoid X receptor in murine  
353 bone marrow-derived macrophages using chromatin immunoprecipitation sequencing. *Methods Mol. Biol.* **1204**, 15–24  
354 (2014).
- 355 12. M Ehrlich, et al., Quantitative high-throughput analysis of DNA methylation patterns by base-specific cleavage and mass  
356 spectrometry. *Proc. Natl. Acad. Sci. U.S.A.* **102**, 15785–15790 (2005).
- 357 13. SR Viswanathan, et al., Lin28 promotes transformation and is associated with advanced human malignancies. *Nat. Genet.*  
358 **41**, 843–848 (2009).
- 359 14. P Tontonoz, E Hu, RA Graves, AI Budavari, BM Spiegelman, mPPAR gamma 2: tissue-specific regulator of an adipocyte  
360 enhancer. *Genes Dev.* **8**, 1224–1234 (1994).
- 361 15. M Reczko, M Maragkakis, P Alexiou, I Grosse, AG Hatzigeorgiou, Functional microRNA targets in protein coding  
362 sequences. *Bioinformatics* **28**, 771–776 (2012).
- 363 16. RC Friedman, KK Farh, CB Burge, DP Bartel, Most mammalian mRNAs are conserved targets of microRNAs. *Genome*  
364 *Res.* **19**, 92–105 (2009).
- 365 17. LJ Core, JJ Waterfall, JT Lis, Nascent RNA sequencing reveals widespread pausing and divergent initiation at human  
366 promoters. *Science* **322**, 1845–1848 (2008).

- 367 18. AA Sigova, et al., Divergent transcription of long noncoding RNA/mRNA gene pairs in embryonic stem cells. *Proc. Natl.*  
368 *Acad. Sci. U.S.A.* **110**, 2876–2881 (2013).
- 369 19. X Luo, M Chae, R Krishnakumar, CG Danko, WL Kraus, Dynamic reorganization of the AC16 cardiomyocyte transcriptome  
370 in response to TNF $\pm$  signaling revealed by integrated genomic analyses. *BMC Genomics* **15**, 155 (2014).
- 371 20. A Wang, et al., Epigenetic priming of enhancers predicts developmental competence of hESC-derived endodermal lineage  
372 intermediates. *Cell Stem Cell* **16**, 386–399 (2015).
- 373 21. C Estaras, C Benner, KA Jones, SMADs and YAP compete to control elongation of  $\beta$ -catenin:LEF-1-recruited RNAPII  
374 during hESC differentiation. *Mol. Cell* **58**, 780–793 (2015).
- 375 22. IM Min, et al., Regulating RNA polymerase pausing and transcription elongation in embryonic stem cells. *Genes Dev.* **25**,  
376 742–754 (2011).
- 377 23. B Fang, et al., Circadian enhancers coordinate multiple phases of rhythmic gene transcription in vivo. *Cell* **159**, 1140–1152  
378 (2014).
- 379 24. RS Illingworth, JJ Holzenspies, FV Roske, WA Bickmore, JM Brickman, Polycomb enables primitive endoderm lineage  
380 priming in embryonic stem cells. *Elife* **5** (2016).
- 381 25. AA Sigova, et al., Transcription factor trapping by RNA in gene regulatory elements. *Science* **350**, 978–981 (2015).
- 382 26. GA Busslinger, et al., Cohesin is positioned in mammalian genomes by transcription, CTCF and Wapl. *Nature* **544**,  
383 503–507 (2017).
- 384 27. Y Zhang, et al., The hepatic circadian clock fine-tunes the lipogenic response to feeding through ROR $\alpha$ / $\beta$ . *Genes Dev.*  
385 **31**, 1202–1211 (2017).
- 386 28. S Heinz, et al., Simple combinations of lineage-determining transcription factors prime cis-regulatory elements required for  
387 macrophage and B cell identities. *Mol. Cell* **38**, 576–589 (2010).
- 388 29. CE Grant, TL Bailey, WS Noble, FIMO: scanning for occurrences of a given motif. *Bioinformatics* **27**, 1017–1018 (2011).
- 389 30. A Sandelin, W Alkema, P Engstrom, WW Wasserman, B Lenhard, JASPAR: an open-access database for eukaryotic  
390 transcription factor binding profiles. *Nucleic Acids Res.* **32**, D91–94 (2004).
- 391 31. JY Chen, et al., Tricyclic Antidepressants Promote Ceramide Accumulation to Regulate Collagen Production in Human  
392 Hepatic Stellate Cells. *Sci Rep* **7**, 44867 (2017).
- 393 32. D Ohlund, et al., Distinct populations of inflammatory fibroblasts and myofibroblasts in pancreatic cancer. *J. Exp. Med.*  
394 **214**, 579–596 (2017).
- 395 33. A Jacobsen, et al., Analysis of microRNA-target interactions across diverse cancer types. *Nat. Struct. Mol. Biol.* **20**,  
396 1325–1332 (2013).
